# Supplementary material for: Patterns, biases and prospects in the distribution and diversity of Neotropical snakes
Source: PubMed Central journal article supplement (PMC5765514; doi:10.1111/geb.12679), 2017-11-23
Supplement: GEB-27-14-s001.pdf [file GEB-27-14-s001.pdf]

## Patterns, biases and prospects in the distribution and diversity of Neotropical snakes

Thaís B. Guedes, Ricardo J. Sawaya, Alexander Zizka, Shawn Laffan, Alexander Pyron, Renato S. Bérnils, Martin Jansen, Paulo Passos, Ana L. C. Prudente, Diego F. Cisneros-Heredia, Henrique B. Braz, Cristiano de C. Nogueira & Alexandre Antonelli

**Appendix S1** List of natural history museums from where the specimens of snakes were examined and point-occurrence was collected to build the Verified Dataset (VD).

| Acronym     | Institution                                                                    | City            | Country   |
|-------------|--------------------------------------------------------------------------------|-----------------|-----------|
| AMNH        | American Museum of Natural History                                             | New York        | U.S.A.    |
| ANSP        | The Academy of Natural Sciences                                                | Philadelphia    | U.S.A.    |
| BMNH        | British Museum of Natural History                                              | London          | U.K.      |
| CAS         | California Academy of Science                                                  | San Francisco   | U.S.A.    |
| CBF         | Colección Boliviana de Fauna                                                   | La Paz          | Bolivia   |
| CBMI        | Colección de Referencia Itaipú Binacional                                      | Ciudad del Este | Paraguay  |
| CCG         | Colección Carlos Grisolia                                                      | Buenos Aires    | Argentina |
| CCNG        | Coleção Carlos Nicolau Gofferjé, Universidade do Vale do Itajaí                | Itajaí          | Brazil    |
| CENAI       | Centro Nacional de Investigaciones Iológica                                    | Buenos Aires    | Argentina |
| CENAI/CHINM | Colección Herpetológica Instituto Nacional de Microbiología Carlos Malbrán     | Buenos Aires    | Argentina |
| CEPB        | Coleção Herpetológica da Pontificia Universidade Católica de Goiais            | Goiania         | Brazil    |
| CEUCH       | Centro de Estudos Universitários da Universidade Federal do Mato Grosso do Sul | Corumbá         | Brazil    |
| CFA         | Colección "Félix de Azára" de Programa de Biología Basica                      | Corrientes      | Argentina |
| CH-UNLS     | Colección Herpetológica de la Universidad Nacional de San Luis                 | San Luis        | Argentina |
| CHBEZ       | Coleção Herpetológica da Universidade Federal do Rio Grande do Norte           | Natal           | Brazil    |
| CHC         | Colección Herpetológica Corrientes                                             | Corrientes      | Argentina |

| <b>Acronym</b> | <b>Institution</b>                                                                      | <b>City</b>           | <b>Country</b> |
|----------------|-----------------------------------------------------------------------------------------|-----------------------|----------------|
| CHUFC          | Museu na Universidade Federal do Ceará                                                  | Fortaleza             | Brazil         |
| CHUFS          | Museu na Universidade Estadual de Sergipe                                               | Aracajú               | Brazil         |
| CHUFSC         | Universidade Federal de Santa Catarina                                                  | Florianópolis         | Brazil         |
| CHUNAM         | Colección Herpetológica de la Universidad Nacional de Misiones                          | Posadas               | Argentina      |
| CHUNB          | Coleção Herpetológica da Universidade de Brasília                                       | Brasília              | Brazil         |
| CIES           | Centro de Investigaciones Ecológicas Subtropicales                                      | Puerto Iguazú         | Argentina      |
| CMNH           | Carnegie Museum                                                                         | Pittsburgh            | U.S.A.         |
| CRUPF          | Museu Zoológico Augusto Ruschi, Universidade de Passo Fundo                             | Passo Fundo           | Brazil         |
| CVR            | Colección de Vertebrados-Reptiles, Facultad de Humanidades y Ciencias                   | Montevideo            | Uruguay        |
| CZA            | Centro de Zoología Aplicada                                                             | Córdoba               | Argentina      |
| CZGB           | Coleção Zoológica Gregogrio Bondar, Universidade Estadual de Santa Cruz                 | Ilhéus                | Brazil         |
| CZNC           | Coleção Zoológica Norte Capixaba                                                        | São Mateus            | Brazil         |
| DB             | Diego Baldo Personal Collection housed at Museo de La Plata (MLP)                       | La Plata              | Argentina      |
| DFCH-USFQ0H    | Diego Cisneros-Heredia Personal Collection housed at Universidad San Francisco de Quito | Quito                 | Ecuador        |
| DHMECN         | División de Herpetología, Museo Ecuatoriano de Ciencias Naturales                       | Quito                 | Ecuador        |
| DZUFRJ         | Departamento de Zoologia da Universidade Federal do Rio de Janeiro                      | Rio de Janeiro        | Brazil         |
| DZURGS         | Departamento de Zoologia da Universidade Federal do Rio Grande do Sul                   | Porto Alegre          | Brazil         |
| EBD            | Estación Ecológica Doñana                                                               | Seville               | Spain          |
| EBRG           | Estación Biológica Rancho Grande                                                        | Maracaybo             | Venezuela      |
| EPN            | Escuela Politécnica Nacional                                                            | Quito                 | Ecuador        |
| FFCLRP         | Faculdade de Filosofia, Ciências e Letras de Ribeirão Preto, Universidade de São Paulo  | Ribeirão Preto        | Brazil         |
| FHGO           | Fundación Herpetologica Gustavo Orces                                                   | Quito                 | Ecuador        |
| FML            | Fundación Miguel Lillo                                                                  | San Miguel de Tucumán | Argentina      |
| FMNH           | Field Museum of Natural History                                                         | Chicago               | U.S.A.         |
| FMT            | Fundação Medicina Tropical                                                              | Manaus                | Brazil         |
| FPR            | Fundacion Puerto Rastrojo                                                               | Bogota                | Colombia       |

| <b>Acronym</b> | <b>Institution</b>                                                                                                   | <b>City</b>    | <b>Country</b> |
|----------------|----------------------------------------------------------------------------------------------------------------------|----------------|----------------|
| FUNED          | Coleção Herpetológica da Fundação Ezequiel Dias                                                                      | Belo Horizonte | Brazil         |
| FURB           | Universidade Regional de Blumenau                                                                                    | Blumenau       | Brazil         |
| FURG           | Universidade Federal do Rio Grande do Sul                                                                            | Porto Alegre   | Brazil         |
| GOV            | Gustavo Orcés-Villagomes Collection (Escuela Politécnica Nacional)                                                   | Quito          | Ecuador        |
| HCPAP          | Coleção de Vertebrados da Embrapa Pantanal                                                                           | Corumbá        | Brazil         |
| HVB            | Hospital Vital Brazil housed at Instituto Butantan                                                                   | São Paulo      | Brazil         |
| IAvH           | Instituto Alexander von Humbolt                                                                                      | Villa de Leyva | Colombia       |
| IBSP           | Instituto Butantan                                                                                                   | São Paulo      | Brazil         |
| ICN            | Instituto de Ciencias Naturales, Universidad Nacional de Colombia                                                    | Bogotá         | Colombia       |
| IMCN-UNSJ      | Instituto y Muso de Ciencias Naturales, Universidad Nacional de San Juan                                             | San Juan       | Argentina      |
| IMTM           | Fundação de Medicina Tropical do Amazonas                                                                            | Manaus         | Brazil         |
| IMZUT          | Instituto e Museo di Zoologia della Università di Torino                                                             | Torino         | Italy          |
| INALI          | Instituto Nacioal de Limnologia                                                                                      | Santa Fe       | Argentina      |
| INPA           | Instituto Nacional de Pesquisas da Amazônia                                                                          | Manaus         | Brazil         |
| IRSBN          | Institut Royal des Sciences Naturelles de Belgique                                                                   | Brussels       | Belgium        |
| IVB            | Instituto Vital Brazil                                                                                               | Niterói        | Brazil         |
| KU             | University of Kansas Biodiversity Institute                                                                          | Lawrence       | U.S.A.         |
| LACM           | Natural History Museum of Los Angeles Country                                                                        | Los Angeles    | U.S.A.         |
| LGE            | Universidad Nacional de Misiones                                                                                     | Misiones       | Argentina      |
| LMZ            | Universidade Federal de Alfenas                                                                                      | Alfenas        | Brazil         |
| LPHA           | Linha de Pesquisa em Herpetologia da Amazônia, Laboratório de Pesquisas Zoológicas, Faculdades Integradas do Tapajós | Santarem       | Brazil         |
| LSUMZ          | Lousiana Museum of Natural History                                                                                   | Baton Rouge    | U.S.A.         |
| LZUFOP         | Laboratório de Zoologia da Universidade Federal de Ouro Preto                                                        | Ouro Preto     | Brazil         |
| MACN           | Museo Argentino de Ciencias Naturales "Bernadino Rivadavia"                                                          | Buenos Aires   | Argentina      |
| MBML           | Museu de Biologia Prof. Mello Leitão                                                                                 | Santa Teresa   | Brazil         |
| MBUCV          | Museo de Biologia de la Universidad Central de Venezuela                                                             | Caracas        | Venezuela      |
| MCN            | Museu de Ciencias Naturais da Fundação Zoobotânica do Rio Grande do Sul                                              | Porto Alegre   | Brazil         |

| <b>Acronym</b> | <b>Institution</b>                                                                   | <b>City</b>             | <b>Country</b> |
|----------------|--------------------------------------------------------------------------------------|-------------------------|----------------|
| MCNG           | Museo de Ciencias Naturales da la UNELLEZ                                            | Guanare                 | Venezuela      |
| MCNR           | Museu de Ciências Naturais da Pontificia Universidade Católica de Minas Gerais       | Belo Horizonte          | Brazil         |
| MCP            | Museu de Ciências e Tecnologia, Pontfícia Universidade Católica do Rio Grande do Sul | Porto Alegre            | Brazil         |
| MCZ            | Museum of Comparative Zoology                                                        | Cambridge               | U.K.           |
| MER            | Museo de Ciencias Naturales y Antropológicas                                         | Paraná                  | Argentina      |
| MFA            | Museo Provincial de Ciencias Naturales "Florentino Ameghino"                         | Santa Fé                | Argentina      |
| MHNCI          | Museu de Historia Natural Capão da Imbuia                                            | Curitiba                | Brazil         |
| MHNG           | Musém d'Histoire naturelle                                                           | Geneve                  | Switzerland    |
| MHNLS          | Museo de Historia Natural La Salle, Fundación La Salle de Ciencias Naturales         | Caracas                 | Venezuela      |
| MHNP           | Museu de História Natural, Prefeitura Municipal de Pirassununga                      | Pirassununga            | Brazil         |
| MLP            | Museo de la Plata                                                                    | La Plata                | Argentina      |
| MLS            | Museo de Historia Natural, Universidad de La Salle                                   | Bogota                  | Colombia       |
| MNHG           | Museum d'Histoire Naturelle                                                          | Geneve                  | France         |
| MNHN           | Muséum National D'Histoire naturelle                                                 | Paris                   | France         |
| MNHNM          | Museo de Historia Natural y Cultura Ambiental                                        | Chapultepec             | Mexico         |
| MNHNP          | Museo Nacional de Historia Natural del Paraguay                                      | San Lorenzo             | Paraguay       |
| MNKR           | Museo de Historia Natural Noel Kempff Mercado                                        | Santa Cruz de La Sierra | Bolivia        |
| MNRJ           | Museu Nacional, Universidade Federal do Rio de Janeiro                               | Rio de Janeiro          | Brazil         |
| MPEG           | Museu Paraense Emilio Goeldi                                                         | Belém                   | Brazil         |
| MPHNLP         | Museo Provincial de Historia Natural de La Pampa                                     | La Pampa                | Argentina      |
| MUFAL          | Museu da Universidade Federal de Alagoas                                             | Maceió                  | Brazil         |
| MUSA           | Museo de la Universidad de Arequipa                                                  | Arequipa                | Peru           |
| MUSM           | Museo de Historia Natural, Universidad Mayor de San Marcos                           | Lima                    | Peru           |
| MVZ            | Museum of Vertebrate Zoology                                                         | Berkeley                | U.S.A.         |
| MZNZ           | Museu de Ciências Naturais da Fundação Zoobotanica do Rio Grande do Sul              | Porto Alegre            | Brazil         |

| <b>Acronym</b> | <b>Institution</b>                                                                                                                | <b>City</b>      | <b>Country</b> |
|----------------|-----------------------------------------------------------------------------------------------------------------------------------|------------------|----------------|
| MZUEFS         | Museu de Zoologia da Universidade Estadual de Feira de Santana                                                                    | Feira de Santana | Brazil         |
| MZUESC         | Museu de Zoologia da Universidade Estadual de Santa Cruz                                                                          | Ilhéus           | Brazil         |
| MZUFBA         | Museu de Zoologia da Universidade Federal da Bahia                                                                                | Salvador         | Brazil         |
| MZUFV          | Museu de Zoologia João Moojen da Universidade Federal de Viçosa                                                                   | Viçosa           | Brazil         |
| MZUSP          | Museu de Zoologia da Universidade de São Paulo                                                                                    | São Paulo        | Brazil         |
| MZUT           | Museo de Zoologia Università di Torino                                                                                            | Turin            | Italy          |
| NHMW           | Natural History Museum of Vienna                                                                                                  | Vienna           | Austria        |
| NMG            | Naturhistoriska Museum of Göteborg                                                                                                | Göteborg         | Sweden         |
| PNEP           | Parque Nacional El Pomar                                                                                                          | Entre Rios       | Argentina      |
| PNLC           | Parque Nacional La Campana Reserva de la Bisfera                                                                                  | Marga            | Chile          |
| QCAZ           | Pontificia Universidad Católica del Ecuador                                                                                       | Quito            | Ecuador        |
| RMNH           | Natural Biodiversity Center                                                                                                       | Leiden           | Netherlands    |
| ROM            | Royal Ontario Museum, Department of Natural History                                                                               | Toronto          | Canada         |
| SARM           | Serpentario Antonio Ruiz de Montoya                                                                                               | Misiones         | Argentina      |
| SDSNH          | San Diego Society of Natural History, San Diego Natural History Museum                                                            | San Diego        | U.S.A.         |
| SMF            | Senckenberg Museum of Frankfurt                                                                                                   | Frankfurt        | Germany        |
| SMNS           | Staatliches Museum für Naturkunde, Stuttgart, Baden-Württemberg                                                                   | Stttgart         | Germany        |
| SMP            | Surinaams Museum; obsolete, transferred to NZCS (National Zoological Collection of Suriname, Anton de Kom University of Suriname) | Paramaribo       | Surinam        |
| TCWC           | Texas Cooperative Wildlife Collection                                                                                             | Austin           | U.S.A.         |
| TU             | Tulane University Museum of Natural History                                                                                       | Belle Chase      | U.S.A.         |
| UBUNAM-CNAR    | Colección Nacional de Anfibios y Reptiles, Universidad Autonoma de Mexico                                                         | Mexico City      | Mexico         |
| UCICB          | Instituto Central de Biología Universidad de Concepcion                                                                           | Concepcion       | Chile          |
| UCM            | University of Colorado Museum of Natural History,                                                                                 | Boulder          | U.S.A.         |
| UCR            | Universidad de Costa Rica, Escuela de Biología, Museo de Zoología, Departamento de Biología                                       | San José         | Costa Rica     |
| UF             | University of Florida, Florida Museum of Natural History                                                                          | Gainesville      | U.S.A.         |

| <b>Acronym</b> | <b>Institution</b>                                                                                                                     | <b>City</b>     | <b>Country</b> |
|----------------|----------------------------------------------------------------------------------------------------------------------------------------|-----------------|----------------|
| UFAC           | Universidade Federal do Acre                                                                                                           | Rio Branco      | Brazil         |
| UFACF          | Universidade Federal do Acre, Campus Cruzeiro do Sul                                                                                   | Cruzeiro do Sul | Brazil         |
| UFJF           | Universidade Federal de Juiz de Fora                                                                                                   | Juiz de Fora    | Brazil         |
| UFMG           | Universidade Federal de Minas Gerais                                                                                                   | Belo Horizonte  | Brazil         |
| UFMT           | Universidade Federal do Mato Grosso                                                                                                    | Cuiabá          | Brazil         |
| UFPB           | Universidade Federal da Paraíba                                                                                                        | João Pessoa     | Brazil         |
| UFU            | Universidade Federal de Uberlândia                                                                                                     | Uberlândia      | Brazil         |
| UMMZ           | Museum of Zoology, University of Michigan                                                                                              | Ann Arbor       | U.S.A.         |
| UNNEC          | Universidad Nacional del Nordeste                                                                                                      | Corrientes      | Argentina      |
| USNM           | United States National Museum, Smithsonian Institution                                                                                 | Maryland        | U.S.A.         |
| UTA            | University of Texas at Arlington                                                                                                       | Arlington       | U.S.A.         |
| YPM            | Yale University, Peabody Museum of Natural History                                                                                     | New Haven       | U.S.A.         |
| ZFMK           | Zoologisches Forschungsmuseum [formerly Forschungsinstitut und Museum] Alexander Koenig                                                | Bonn            | Germany        |
| ZMA            | Zoölogisch Museum, Universiteit van Amsterdam                                                                                          | Amsterdam       | Netherlands    |
| ZMB            | Museum für Naturkunde Berlin                                                                                                           | Berlin          | Germany        |
| ZMH            | Zoological Museum Hamburg [Biozentrum Grindel und Zoologisches Museum; formerly Zoologisches Institut und Museum], Universität Hamburg | Hamburg         | Germany        |
| ZMUC           | Zoological Museum, University of Copenhagen                                                                                            | Copenhagen      | Denmark        |
| ZSMH           | Zoologische Staatssammlung München                                                                                                     | Munich          | Germany        |
| ZUEC           | Museu de Zoologia Dr. Adão José Cardoso da Universidade de Campinas                                                                    | Campinas        | Brazil         |
| ZUFMS          | Coleção Zoológica de Referência da Universidade Federal de Mato Grosso do Sul                                                          | Campo Grande    | Brazil         |
| ZUFRJ          | Departamento de Zoologia, Instituto de Biologia, Universidade Federal do Rio de Janeiro                                                | Rio de Janeiro  | Brazil         |
| ZVC-R          | Colección de Zoología Vertebrados de la Facultad de Ciencias, Universidad de la República                                              | Montevideo      | Uruguay        |
