# Supplementary material for: Patterns, biases and prospects in the distribution and diversity of Neotropical snakes
Source: PubMed Central journal article supplement (PMC5765514; doi:10.1111/geb.12679), 2017-11-23
Supplement: GEB-27-14-s004.pdf [file GEB-27-14-s004.pdf]

## Patterns, biases and prospects in the distribution and diversity of Neotropical snakes

Thaís B. Guedes, Ricardo J. Sawaya, Alexander Zizka, Shawn Laffan, Alexander Pyron, Renato S. Bérnils, Martin Jansen, Paulo Passos, Ana L. C. Prudente, Diego F. Cisneros-Heredia, Henrique B. Braz, Cristiano de C. Nogueira & Alexandre Antonelli

**Appendix S4** List of all species and families of Neotropical snakes used in this study and their status of knowledge of geographical distribution. Status of knowledge of geographical distribution: we evaluated, guided by literature and under scrutiny and validation of experts, the geographic distribution reported for each species using the CD. We classified as "poorly-known" (N= 278 spp.) the taxa with few known specimens apparently due to low population density, taxonomic or nomenclature problems, as well as comprising species recently described on the basis of small series (see B criterion in Categories and Criteria 2017-1 in IUCN, see <http://www.iucnredlist.org/technical-documents/categories-and-criteria>); or "well-known" (N= 608 spp.) the opposite.

| Neotropical snakes                  | Families    | Status of knowledge of geographical distribution |
|-------------------------------------|-------------|--------------------------------------------------|
| <i>Adelophis copei</i>              | Natricidae  | Poorly-known                                     |
| <i>Adelphicos latifasciatum</i>     | Dipsadidae  | Poorly-known                                     |
| <i>Adelphicos nigrilatum</i>        | Dipsadidae  | Well-known                                       |
| <i>Adelphicos quadrivirgatum</i>    | Dipsadidae  | Well-known                                       |
| <i>Adelphicos veraepacis</i>        | Dipsadidae  | Poorly-known                                     |
| <i>Agkistrodon bilineatus</i>       | Viperidae   | Well-known                                       |
| <i>Alsophis rijgersmaei</i>         | Dipsadidae  | Well-known                                       |
| <i>Alsophis rufiventris</i>         | Dipsadidae  | Well-known                                       |
| <i>Amastridium veliferum</i>        | Dipsadidae  | Poorly-known                                     |
| <i>Amerotyphlops amoipira</i>       | Typhlopidae | Well-known                                       |
| <i>Amerotyphlops arenensis</i>      | Typhlopidae | Poorly-known                                     |
| <i>Amerotyphlops brongersmianus</i> | Typhlopidae | Well-known                                       |
| <i>Amerotyphlops costaricensis</i>  | Typhlopidae | Poorly-known                                     |
| <i>Amerotyphlops lehneri</i>        | Typhlopidae | Poorly-known                                     |

| <b>Neotropical snakes</b>           | <b>Families</b> | <b>Status of knowledge of geographical distribution</b> |
|-------------------------------------|-----------------|---------------------------------------------------------|
| <i>Amerotyphlops minuisquamus</i>   | Typhlopidae     | Well-known                                              |
| <i>Amerotyphlops paucisquamus</i>   | Typhlopidae     | Well-known                                              |
| <i>Amerotyphlops reticulatus</i>    | Typhlopidae     | Well-known                                              |
| <i>Amerotyphlops stadelmani</i>     | Typhlopidae     | Poorly-known                                            |
| <i>Amerotyphlops tasymicris</i>     | Typhlopidae     | Well-known                                              |
| <i>Amerotyphlops tenuis</i>         | Typhlopidae     | Poorly-known                                            |
| <i>Amerotyphlops yonenagae</i>      | Typhlopidae     | Poorly-known                                            |
| <i>Anilius scytale</i>              | Aniliidae       | Well-known                                              |
| <i>Apostolepis</i> aff. <i>pymi</i> | Dipsadidae      | Well-known                                              |
| <i>Apostolepis albicollaris</i>     | Dipsadidae      | Well-known                                              |
| <i>Apostolepis ambinigra</i>        | Dipsadidae      | Well-known                                              |
| <i>Apostolepis ammodites</i>        | Dipsadidae      | Well-known                                              |
| <i>Apostolepis arenaria</i>         | Dipsadidae      | Poorly-known                                            |
| <i>Apostolepis assimilis</i>        | Dipsadidae      | Well-known                                              |
| <i>Apostolepis cearensis</i>        | Dipsadidae      | Well-known                                              |
| <i>Apostolepis cerradoensis</i>     | Dipsadidae      | Poorly-known                                            |
| <i>Apostolepis christineae</i>      | Dipsadidae      | Poorly-known                                            |
| <i>Apostolepis dimidiata</i>        | Dipsadidae      | Well-known                                              |
| <i>Apostolepis dorbignyi</i>        | Dipsadidae      | Poorly-known                                            |
| <i>Apostolepis flavotorquata</i>    | Dipsadidae      | Well-known                                              |
| <i>Apostolepis gaboi</i>            | Dipsadidae      | Well-known                                              |
| <i>Apostolepis goiasensis</i>       | Dipsadidae      | Well-known                                              |
| <i>Apostolepis intermedia</i>       | Dipsadidae      | Well-known                                              |
| <i>Apostolepis lineata</i>          | Dipsadidae      | Poorly-known                                            |
| <i>Apostolepis longicaudata</i>     | Dipsadidae      | Well-known                                              |
| <i>Apostolepis multicincta</i>      | Dipsadidae      | Well-known                                              |
| <i>Apostolepis nelsonjorgei</i>     | Dipsadidae      | Well-known                                              |

| Neotropical snakes                | Families   | Status of knowledge of geographical distribution |
|-----------------------------------|------------|--------------------------------------------------|
| <i>Apostolepis niceforoi</i>      | Dipsadidae | Poorly-known                                     |
| <i>Apostolepis nigrolineata</i>   | Dipsadidae | Well-known                                       |
| <i>Apostolepis nigroterminata</i> | Dipsadidae | Well-known                                       |
| <i>Apostolepis phillipsi</i>      | Dipsadidae | Poorly-known                                     |
| <i>Apostolepis polylepis</i>      | Dipsadidae | Well-known                                       |
| <i>Apostolepis pyimi</i>          | Dipsadidae | Well-known                                       |
| <i>Apostolepis quirogai</i>       | Dipsadidae | Poorly-known                                     |
| <i>Apostolepis serrana</i>        | Dipsadidae | Poorly-known                                     |
| <i>Apostolepis striata</i>        | Dipsadidae | Poorly-known                                     |
| <i>Apostolepis tertulianobeui</i> | Dipsadidae | Well-known                                       |
| <i>Apostolepis vittata</i>        | Dipsadidae | Poorly-known                                     |
| <i>Arizona elegans</i>            | Colubridae | Poorly-known                                     |
| <i>Arrhyton dolichura</i>         | Dipsadidae | Well-known                                       |
| <i>Arrhyton redimitum</i>         | Dipsadidae | Well-known                                       |
| <i>Arrhyton taeniatum</i>         | Dipsadidae | Well-known                                       |
| <i>Arrhyton vittatum</i>          | Dipsadidae | Well-known                                       |
| <i>Atractus albuquerquei</i>      | Dipsadidae | Well-known                                       |
| <i>Atractus alphonsehogeii</i>    | Dipsadidae | Well-known                                       |
| <i>Atractus altagratiae</i>       | Dipsadidae | Poorly-known                                     |
| <i>Atractus badius</i>            | Dipsadidae | Well-known                                       |
| <i>Atractus bocki</i>             | Dipsadidae | Poorly-known                                     |
| <i>Atractus bocourti</i>          | Dipsadidae | Poorly-known                                     |
| <i>Atractus boettgeri</i>         | Dipsadidae | Poorly-known                                     |
| <i>Atractus caete</i>             | Dipsadidae | Poorly-known                                     |
| <i>Atractus carrioni</i>          | Dipsadidae | Poorly-known                                     |
| <i>Atractus caxiuana</i>          | Dipsadidae | Well-known                                       |
| <i>Atractus charitoae</i>         | Dipsadidae | Poorly-known                                     |

| Neotropical snakes              | Families   | Status of knowledge of geographical distribution |
|---------------------------------|------------|--------------------------------------------------|
| <i>Atractus collaris</i>        | Dipsadidae | Well-known                                       |
| <i>Atractus crassicaudatus</i>  | Dipsadidae | Poorly-known                                     |
| <i>Atractus dunni</i>           | Dipsadidae | Poorly-known                                     |
| <i>Atractus edioi</i>           | Dipsadidae | Poorly-known                                     |
| <i>Atractus elaps</i>           | Dipsadidae | Well-known                                       |
| <i>Atractus emmeli</i>          | Dipsadidae | Well-known                                       |
| <i>Atractus erythromelas</i>    | Dipsadidae | Poorly-known                                     |
| <i>Atractus flammigerus</i>     | Dipsadidae | Poorly-known                                     |
| <i>Atractus franciscopaivai</i> | Dipsadidae | Poorly-known                                     |
| <i>Atractus francoi</i>         | Dipsadidae | Well-known                                       |
| <i>Atractus fuliginosus</i>     | Dipsadidae | Poorly-known                                     |
| <i>Atractus gaigeae</i>         | Dipsadidae | Poorly-known                                     |
| <i>Atractus guentheri</i>       | Dipsadidae | Well-known                                       |
| <i>Atractus heliobelluomini</i> | Dipsadidae | Poorly-known                                     |
| <i>Atractus hoogmoedi</i>       | Dipsadidae | Poorly-known                                     |
| <i>Atractus insipidus</i>       | Dipsadidae | Poorly-known                                     |
| <i>Atractus latifrons</i>       | Dipsadidae | Well-known                                       |
| <i>Atractus lehmanni</i>        | Dipsadidae | Poorly-known                                     |
| <i>Atractus maculatus</i>       | Dipsadidae | Well-known                                       |
| <i>Atractus major</i>           | Dipsadidae | Well-known                                       |
| <i>Atractus microrhynchus</i>   | Dipsadidae | Poorly-known                                     |
| <i>Atractus multicinctus</i>    | Dipsadidae | Poorly-known                                     |
| <i>Atractus natans</i>          | Dipsadidae | Well-known                                       |
| <i>Atractus obtusirostris</i>   | Dipsadidae | Poorly-known                                     |
| <i>Atractus occidentalis</i>    | Dipsadidae | Poorly-known                                     |
| <i>Atractus occipitoalbus</i>   | Dipsadidae | Poorly-known                                     |
| <i>Atractus oculotemporalis</i> | Dipsadidae | Poorly-known                                     |

| Neotropical snakes              | Families   | Status of knowledge of geographical distribution |
|---------------------------------|------------|--------------------------------------------------|
| <i>Atractus orcesi</i>          | Dipsadidae | Poorly-known                                     |
| <i>Atractus pantostictus</i>    | Dipsadidae | Well-known                                       |
| <i>Atractus paraguayensis</i>   | Dipsadidae | Well-known                                       |
| <i>Atractus paucidens</i>       | Dipsadidae | Well-known                                       |
| <i>Atractus poeppigi</i>        | Dipsadidae | Well-known                                       |
| <i>Atractus potschi</i>         | Dipsadidae | Well-known                                       |
| <i>Atractus punctiventris</i>   | Dipsadidae | Poorly-known                                     |
| <i>Atractus reticulatus</i>     | Dipsadidae | Well-known                                       |
| <i>Atractus riveroi</i>         | Dipsadidae | Poorly-known                                     |
| <i>Atractus ronnie</i>          | Dipsadidae | Well-known                                       |
| <i>Atractus roulei</i>          | Dipsadidae | Poorly-known                                     |
| <i>Atractus sanctaemartae</i>   | Dipsadidae | Poorly-known                                     |
| <i>Atractus schach</i>          | Dipsadidae | Well-known                                       |
| <i>Atractus serranus</i>        | Dipsadidae | Well-known                                       |
| <i>Atractus snethlageae</i>     | Dipsadidae | Well-known                                       |
| <i>Atractus spinalis</i>        | Dipsadidae | Poorly-known                                     |
| <i>Atractus surucucu</i>        | Dipsadidae | Poorly-known                                     |
| <i>Atractus thalesdelemai</i>   | Dipsadidae | Poorly-known                                     |
| <i>Atractus torquatus</i>       | Dipsadidae | Well-known                                       |
| <i>Atractus trihedrurus</i>     | Dipsadidae | Well-known                                       |
| <i>Atractus trilineatus</i>     | Dipsadidae | Well-known                                       |
| <i>Atractus univittatus</i>     | Dipsadidae | Poorly-known                                     |
| <i>Atractus ventrimaculatus</i> | Dipsadidae | Poorly-known                                     |
| <i>Atractus zebrinus</i>        | Dipsadidae | Well-known                                       |
| <i>Atractus zidoki</i>          | Dipsadidae | Well-known                                       |
| <i>Atropoides nummifer</i>      | Viperidae  | Well-known                                       |
| <i>Atropoides picadoi</i>       | Viperidae  | Well-known                                       |

| <b>Neotropical snakes</b>           | <b>Families</b> | <b>Status of knowledge of geographical distribution</b> |
|-------------------------------------|-----------------|---------------------------------------------------------|
| <i>Boa constrictor</i>              | Boidae          | Well-known                                              |
| <i>Boiruna maculata</i>             | Dipsadidae      | Well-known                                              |
| <i>Boiruna sertaneja</i>            | Dipsadidae      | Well-known                                              |
| <i>Borikenophis portoricensis</i>   | Dipsadidae      | Well-known                                              |
| <i>Bothriechis aurifer</i>          | Viperidae       | Poorly-known                                            |
| <i>Bothriechis bicolor</i>          | Viperidae       | Poorly-known                                            |
| <i>Bothriechis lateralis</i>        | Viperidae       | Well-known                                              |
| <i>Bothriechis marchi</i>           | Viperidae       | Poorly-known                                            |
| <i>Bothriechis nigroviridis</i>     | Viperidae       | Well-known                                              |
| <i>Bothriechis rowleyi</i>          | Viperidae       | Poorly-known                                            |
| <i>Bothriechis schlegelii</i>       | Viperidae       | Poorly-known                                            |
| <i>Bothriechis thalassinus</i>      | Viperidae       | Poorly-known                                            |
| <i>Bothrocophias hyoprora</i>       | Viperidae       | Well-known                                              |
| <i>Bothrocophias microphthalmus</i> | Viperidae       | Well-known                                              |
| <i>Bothrocophias myersi</i>         | Viperidae       | Poorly-known                                            |
| <i>Bothrops alcatraz</i>            | Viperidae       | Well-known                                              |
| <i>Bothrops alternatus</i>          | Viperidae       | Well-known                                              |
| <i>Bothrops ammodytoides</i>        | Viperidae       | Well-known                                              |
| <i>Bothrops andianus</i>            | Viperidae       | Poorly-known                                            |
| <i>Bothrops asper</i>               | Viperidae       | Well-known                                              |
| <i>Bothrops atrox</i>               | Viperidae       | Well-known                                              |
| <i>Bothrops barnetti</i>            | Viperidae       | Poorly-known                                            |
| <i>Bothrops bilineatus</i>          | Viperidae       | Well-known                                              |
| <i>Bothrops brazili</i>             | Viperidae       | Well-known                                              |
| <i>Bothrops cotiara</i>             | Viperidae       | Well-known                                              |
| <i>Bothrops diporus</i>             | Viperidae       | Well-known                                              |
| <i>Bothrops erythromelas</i>        | Viperidae       | Well-known                                              |

| Neotropical snakes               | Families   | Status of knowledge of geographical distribution |
|----------------------------------|------------|--------------------------------------------------|
| <i>Bothrops fonsecai</i>         | Viperidae  | Well-known                                       |
| <i>Bothrops insularis</i>        | Viperidae  | Well-known                                       |
| <i>Bothrops itapetiningae</i>    | Viperidae  | Well-known                                       |
| <i>Bothrops jararaca</i>         | Viperidae  | Well-known                                       |
| <i>Bothrops jararacussu</i>      | Viperidae  | Well-known                                       |
| <i>Bothrops leucurus</i>         | Viperidae  | Well-known                                       |
| <i>Bothrops lojanus</i>          | Viperidae  | Poorly-known                                     |
| <i>Bothrops lutzi</i>            | Viperidae  | Well-known                                       |
| <i>Bothrops marajoensis</i>      | Viperidae  | Well-known                                       |
| <i>Bothrops marmoratus</i>       | Viperidae  | Well-known                                       |
| <i>Bothrops mattogrossensis</i>  | Viperidae  | Well-known                                       |
| <i>Bothrops moojeni</i>          | Viperidae  | Well-known                                       |
| <i>Bothrops muriciensis</i>      | Viperidae  | Poorly-known                                     |
| <i>Bothrops neuwiedi</i>         | Viperidae  | Well-known                                       |
| <i>Bothrops oligolepis</i>       | Viperidae  | Poorly-known                                     |
| <i>Bothrops otavioi</i>          | Viperidae  | Well-known                                       |
| <i>Bothrops pauloensis</i>       | Viperidae  | Well-known                                       |
| <i>Bothrops pictus</i>           | Viperidae  | Poorly-known                                     |
| <i>Bothrops pirajai</i>          | Viperidae  | Well-known                                       |
| <i>Bothrops pubescens</i>        | Viperidae  | Well-known                                       |
| <i>Bothrops pulchra</i>          | Viperidae  | Poorly-known                                     |
| <i>Bothrops punctatus</i>        | Viperidae  | Poorly-known                                     |
| <i>Bothrops taeniatus</i>        | Viperidae  | Well-known                                       |
| <i>Bothrops venezuelensis</i>    | Viperidae  | Poorly-known                                     |
| <i>Caaeteboia amarali</i>        | Dipsadidae | Well-known                                       |
| <i>Calamodontophis paucidens</i> | Dipsadidae | Well-known                                       |
| <i>Calamodontophis ronaldoi</i>  | Dipsadidae | Poorly-known                                     |

| <b>Neotropical snakes</b>        | <b>Families</b> | <b>Status of knowledge of geographical distribution</b> |
|----------------------------------|-----------------|---------------------------------------------------------|
| <i>Caraiba andreae</i>           | Dipsadidae      | Well-known                                              |
| <i>Cerrophidion godmani</i>      | Viperidae       | Well-known                                              |
| <i>Cerrophidion tzotzilorum</i>  | Viperidae       | Poorly-known                                            |
| <i>Chapinophis xanthocheilus</i> | Dipsadidae      | Poorly-known                                            |
| <i>Chersodromus liebmanni</i>    | Dipsadidae      | Poorly-known                                            |
| <i>Chilabothrus angulifer</i>    | Boidae          | Well-known                                              |
| <i>Chilabothrus fordii</i>       | Boidae          | Well-known                                              |
| <i>Chilabothrus gracilis</i>     | Boidae          | Well-known                                              |
| <i>Chilabothrus inornatus</i>    | Boidae          | Well-known                                              |
| <i>Chilabothrus striatus</i>     | Boidae          | Well-known                                              |
| <i>Chironius bicarinatus</i>     | Colubridae      | Well-known                                              |
| <i>Chironius brazili</i>         | Colubridae      | Well-known                                              |
| <i>Chironius carinatus</i>       | Colubridae      | Well-known                                              |
| <i>Chironius diamantina</i>      | Colubridae      | Well-known                                              |
| <i>Chironius exoletus</i>        | Colubridae      | Well-known                                              |
| <i>Chironius flavolineatus</i>   | Colubridae      | Well-known                                              |
| <i>Chironius flavopictus</i>     | Colubridae      | Poorly-known                                            |
| <i>Chironius foveatus</i>        | Colubridae      | Well-known                                              |
| <i>Chironius fuscus</i>          | Colubridae      | Well-known                                              |
| <i>Chironius grandisquamis</i>   | Colubridae      | Poorly-known                                            |
| <i>Chironius laevicollis</i>     | Colubridae      | Well-known                                              |
| <i>Chironius laurenti</i>        | Colubridae      | Well-known                                              |
| <i>Chironius maculoventris</i>   | Colubridae      | Well-known                                              |
| <i>Chironius monticola</i>       | Colubridae      | Poorly-known                                            |
| <i>Chironius multiventris</i>    | Colubridae      | Well-known                                              |
| <i>Chironius quadricarinatus</i> | Colubridae      | Well-known                                              |
| <i>Chironius scurrulus</i>       | Colubridae      | Well-known                                              |



| <b>Neotropical snakes</b>        | <b>Families</b> | <b>Status of knowledge of geographical distribution</b> |
|----------------------------------|-----------------|---------------------------------------------------------|
| <i>Chironius septentrionalis</i> | Colubridae      | Well-known                                              |
| <i>Clelia clelia</i>             | Dipsadidae      | Well-known                                              |
| <i>Clelia equatoriana</i>        | Dipsadidae      | Well-known                                              |
| <i>Clelia errabunda</i>          | Dipsadidae      | Well-known                                              |
| <i>Clelia hussami</i>            | Dipsadidae      | Well-known                                              |
| <i>Clelia langeri</i>            | Dipsadidae      | Well-known                                              |
| <i>Clelia plumbea</i>            | Dipsadidae      | Well-known                                              |
| <i>Clelia scytalina</i>          | Dipsadidae      | Well-known                                              |
| <i>Coluber bilineatus</i>        | Colubridae      | Well-known                                              |
| <i>Coluber constrictor</i>       | Colubridae      | Well-known                                              |
| <i>Coluber flagellum</i>         | Colubridae      | Poorly-known                                            |
| <i>Coluber mentovarius</i>       | Colubridae      | Well-known                                              |
| <i>Coluber schotti</i>           | Colubridae      | Well-known                                              |
| <i>Coluber taeniatus</i>         | Colubridae      | Well-known                                              |
| <i>Coniophanes alvarezi</i>      | Dipsadidae      | Well-known                                              |
| <i>Coniophanes bipunctatus</i>   | Dipsadidae      | Poorly-known                                            |
| <i>Coniophanes fissidens</i>     | Dipsadidae      | Well-known                                              |
| <i>Coniophanes imperialis</i>    | Dipsadidae      | Well-known                                              |
| <i>Coniophanes lateritius</i>    | Dipsadidae      | Well-known                                              |
| <i>Coniophanes meridanus</i>     | Dipsadidae      | Poorly-known                                            |
| <i>Coniophanes piceivittis</i>   | Dipsadidae      | Well-known                                              |
| <i>Coniophanes schmidti</i>      | Dipsadidae      | Well-known                                              |
| <i>Conopsis lineatus</i>         | Dipsadidae      | Well-known                                              |
| <i>Conopsis vittatus</i>         | Dipsadidae      | Well-known                                              |
| <i>Conopsis biserialis</i>       | Colubridae      | Well-known                                              |
| <i>Conopsis lineata</i>          | Colubridae      | Well-known                                              |
| <i>Conopsis megalodon</i>        | Colubridae      | Well-known                                              |

| <b>Neotropical snakes</b>       | <b>Families</b> | <b>Status of knowledge of geographical distribution</b> |
|---------------------------------|-----------------|---------------------------------------------------------|
| <i>Conopsis nasus</i>           | Colubridae      | Well-known                                              |
| <i>Corallus annulatus</i>       | Boidae          | Poorly-known                                            |
| <i>Corallus batesii</i>         | Boidae          | Well-known                                              |
| <i>Corallus caninus</i>         | Boidae          | Well-known                                              |
| <i>Corallus cookii</i>          | Boidae          | Well-known                                              |
| <i>Corallus cropanii</i>        | Boidae          | Poorly-known                                            |
| <i>Corallus hortulanus</i>      | Boidae          | Well-known                                              |
| <i>Corallus ruschenbergerii</i> | Boidae          | Poorly-known                                            |
| <i>Coronelaps lepidus</i>       | Dipsadidae      | Well-known                                              |
| <i>Crisantophis nevermanni</i>  | Dipsadidae      | Poorly-known                                            |
| <i>Crotalus aquilus</i>         | Viperidae       | Well-known                                              |
| <i>Crotalus atrox</i>           | Viperidae       | Well-known                                              |
| <i>Crotalus basiliscus</i>      | Viperidae       | Well-known                                              |
| <i>Crotalus durissus</i>        | Viperidae       | Well-known                                              |
| <i>Crotalus intermedius</i>     | Viperidae       | Well-known                                              |
| <i>Crotalus lepidus</i>         | Viperidae       | Poorly-known                                            |
| <i>Crotalus molossus</i>        | Viperidae       | Well-known                                              |
| <i>Crotalus polystictus</i>     | Viperidae       | Well-known                                              |
| <i>Crotalus pricei</i>          | Viperidae       | Poorly-known                                            |
| <i>Crotalus pusillus</i>        | Viperidae       | Well-known                                              |
| <i>Crotalus ravus</i>           | Viperidae       | Well-known                                              |
| <i>Crotalus scutulatus</i>      | Viperidae       | Poorly-known                                            |
| <i>Crotalus stejnegeri</i>      | Viperidae       | Poorly-known                                            |
| <i>Crotalus tigris</i>          | Viperidae       | Poorly-known                                            |
| <i>Crotalus triseriatus</i>     | Viperidae       | Well-known                                              |
| <i>Crotalus willardi</i>        | Viperidae       | Poorly-known                                            |
| <i>Cryophis hallbergi</i>       | Dipsadidae      | Poorly-known                                            |

| Neotropical snakes                  | Families   | Status of knowledge of geographical distribution |
|-------------------------------------|------------|--------------------------------------------------|
| <i>Cubophis cantherigerus</i>       | Dipsadidae | Well-known                                       |
| <i>Cubophis vudii</i>               | Dipsadidae | Well-known                                       |
| <i>Dendrophidion atlantica</i>      | Colubridae | Well-known                                       |
| <i>Dendrophidion bivittatum</i>     | Colubridae | Poorly-known                                     |
| <i>Dendrophidion brunneum</i>       | Colubridae | Poorly-known                                     |
| <i>Dendrophidion dendrophis</i>     | Colubridae | Well-known                                       |
| <i>Dendrophidion nuchale</i>        | Colubridae | Poorly-known                                     |
| <i>Dendrophidion paucicarinatum</i> | Colubridae | Well-known                                       |
| <i>Dendrophidion percarinatum</i>   | Colubridae | Poorly-known                                     |
| <i>Dendrophidion vinitor</i>        | Colubridae | Well-known                                       |
| <i>Diadophis punctatus</i>          | Dipsadidae | Poorly-known                                     |
| <i>Dipsas albifrons</i>             | Dipsadidae | Well-known                                       |
| <i>Dipsas alternans</i>             | Dipsadidae | Well-known                                       |
| <i>Dipsas andiana</i>               | Dipsadidae | Well-known                                       |
| <i>Dipsas articulata</i>            | Dipsadidae | Poorly-known                                     |
| <i>Dipsas brevifacies</i>           | Dipsadidae | Well-known                                       |
| <i>Dipsas bucephala</i>             | Dipsadidae | Well-known                                       |
| <i>Dipsas catesbyi</i>              | Dipsadidae | Well-known                                       |
| <i>Dipsas copei</i>                 | Dipsadidae | Well-known                                       |
| <i>Dipsas gracilis</i>              | Dipsadidae | Poorly-known                                     |
| <i>Dipsas indica</i>                | Dipsadidae | Well-known                                       |
| <i>Dipsas oreas</i>                 | Dipsadidae | Well-known                                       |
| <i>Dipsas pavonina</i>              | Dipsadidae | Well-known                                       |
| <i>Dipsas peruana</i>               | Dipsadidae | Poorly-known                                     |
| <i>Dipsas sanctijoannis</i>         | Dipsadidae | Poorly-known                                     |
| <i>Dipsas sazimai</i>               | Dipsadidae | Well-known                                       |
| <i>Dipsas variegata</i>             | Dipsadidae | Well-known                                       |

| <b>Neotropical snakes</b>           | <b>Families</b> | <b>Status of knowledge of geographical distribution</b> |
|-------------------------------------|-----------------|---------------------------------------------------------|
| <i>Dipsas vermiculata</i>           | Dipsadidae      | Poorly-known                                            |
| <i>Ditaxodon taeniatus</i>          | Dipsadidae      | Well-known                                              |
| <i>Drepanoides anomalus</i>         | Dipsadidae      | Well-known                                              |
| <i>Drymarchon corais</i>            | Colubridae      | Well-known                                              |
| <i>Drymarchon melanurus</i>         | Colubridae      | Poorly-known                                            |
| <i>Drymobius chloroticus</i>        | Colubridae      | Well-known                                              |
| <i>Drymobius margaritiferus</i>     | Colubridae      | Well-known                                              |
| <i>Drymobius melanotropis</i>       | Colubridae      | Poorly-known                                            |
| <i>Drymobius rhombifer</i>          | Colubridae      | Well-known                                              |
| <i>Drymoluber brazili</i>           | Colubridae      | Well-known                                              |
| <i>Drymoluber dichrous</i>          | Colubridae      | Well-known                                              |
| <i>Echianthera amoena</i>           | Dipsadidae      | Well-known                                              |
| <i>Echianthera cephalomaculata</i>  | Dipsadidae      | Poorly-known                                            |
| <i>Echianthera cephalostriata</i>   | Dipsadidae      | Well-known                                              |
| <i>Echianthera cyanopleura</i>      | Dipsadidae      | Well-known                                              |
| <i>Echianthera melanostigma</i>     | Dipsadidae      | Well-known                                              |
| <i>Echianthera undulata</i>         | Dipsadidae      | Well-known                                              |
| <i>Elapomorphus quinquelineatus</i> | Dipsadidae      | Well-known                                              |
| <i>Elapomorphus wuchereri</i>       | Dipsadidae      | Well-known                                              |
| <i>Enuliophis sclateri</i>          | Dipsadidae      | Poorly-known                                            |
| <i>Enulius flavitorques</i>         | Dipsadidae      | Well-known                                              |
| <i>Enulius oligostichus</i>         | Dipsadidae      | Poorly-known                                            |
| <i>Epicrates alvarezi</i>           | Boidae          | Well-known                                              |
| <i>Epicrates assisi</i>             | Boidae          | Well-known                                              |
| <i>Epicrates cenchria</i>           | Boidae          | Well-known                                              |
| <i>Epicrates crassus</i>            | Boidae          | Well-known                                              |
| <i>Epicrates maurus</i>             | Boidae          | Well-known                                              |

| Neotropical snakes                    | Families         | Status of knowledge of geographical distribution |
|---------------------------------------|------------------|--------------------------------------------------|
| <i>Epictia albipuncta</i>             | Leptotyphlopidae | Well-known                                       |
| <i>Epictia australis</i>              | Leptotyphlopidae | Well-known                                       |
| <i>Epictia borapeliotes</i>           | Leptotyphlopidae | Well-known                                       |
| <i>Epictia clinorostris</i>           | Leptotyphlopidae | Poorly-known                                     |
| <i>Epictia diaplocia</i>              | Leptotyphlopidae | Poorly-known                                     |
| <i>Epictia goudotii</i>               | Leptotyphlopidae | Well-known                                       |
| <i>Epictia munoai</i>                 | Leptotyphlopidae | Well-known                                       |
| <i>Epictia striatula</i>              | Leptotyphlopidae | Well-known                                       |
| <i>Epictia subcrotilla</i>            | Leptotyphlopidae | Poorly-known                                     |
| <i>Epictia tenella</i>                | Leptotyphlopidae | Well-known                                       |
| <i>Epictia vellardi</i>               | Leptotyphlopidae | Well-known                                       |
| <i>Erythrolamprus aesculapii</i>      | Dipsadidae       | Well-known                                       |
| <i>Erythrolamprus albertguentheri</i> | Dipsadidae       | Well-known                                       |
| <i>Erythrolamprus almadensis</i>      | Dipsadidae       | Well-known                                       |
| <i>Erythrolamprus atraventer</i>      | Dipsadidae       | Well-known                                       |
| <i>Erythrolamprus bizona</i>          | Dipsadidae       | Well-known                                       |
| <i>Erythrolamprus breviceps</i>       | Dipsadidae       | Well-known                                       |
| <i>Erythrolamprus carajasensis</i>    | Dipsadidae       | Well-known                                       |
| <i>Erythrolamprus ceii</i>            | Dipsadidae       | Poorly-known                                     |
| <i>Erythrolamprus cobella</i>         | Dipsadidae       | Well-known                                       |
| <i>Erythrolamprus dorsocorallinus</i> | Dipsadidae       | Well-known                                       |
| <i>Erythrolamprus epinephelus</i>     | Dipsadidae       | Well-known                                       |
| <i>Erythrolamprus frenatus</i>        | Dipsadidae       | Well-known                                       |
| <i>Erythrolamprus jaegeri</i>         | Dipsadidae       | Well-known                                       |
| <i>Erythrolamprus maryellenae</i>     | Dipsadidae       | Well-known                                       |
| <i>Erythrolamprus melanotus</i>       | Dipsadidae       | Well-known                                       |
| <i>Erythrolamprus mertensi</i>        | Dipsadidae       | Poorly-known                                     |

| <b>Neotropical snakes</b>          | <b>Families</b> | <b>Status of knowledge of geographical distribution</b> |
|------------------------------------|-----------------|---------------------------------------------------------|
| <i>Erythrolamprus miliaris</i>     | Dipsadidae      | Well-known                                              |
| <i>Erythrolamprus mimus</i>        | Dipsadidae      | Well-known                                              |
| <i>Erythrolamprus mossoroensis</i> | Dipsadidae      | Well-known                                              |
| <i>Erythrolamprus oligolepis</i>   | Dipsadidae      | Well-known                                              |
| <i>Erythrolamprus poecilogyrus</i> | Dipsadidae      | Well-known                                              |
| <i>Erythrolamprus pygmaeus</i>     | Dipsadidae      | Well-known                                              |
| <i>Erythrolamprus reginae</i>      | Dipsadidae      | Well-known                                              |
| <i>Erythrolamprus sagittifer</i>   | Dipsadidae      | Well-known                                              |
| <i>Erythrolamprus semiaureus</i>   | Dipsadidae      | Well-known                                              |
| <i>Erythrolamprus taeniogaster</i> | Dipsadidae      | Well-known                                              |
| <i>Erythrolamprus taeniurus</i>    | Dipsadidae      | Poorly-known                                            |
| <i>Erythrolamprus triscalis</i>    | Dipsadidae      | Well-known                                              |
| <i>Erythrolamprus typhlus</i>      | Dipsadidae      | Well-known                                              |
| <i>Erythrolamprus viridis</i>      | Dipsadidae      | Well-known                                              |
| <i>Erythrolamprus williamsi</i>    | Dipsadidae      | Poorly-known                                            |
| <i>Erythrolamprus zweifeli</i>     | Dipsadidae      | Well-known                                              |
| <i>Eunectes deschauenseei</i>      | Boidae          | Well-known                                              |
| <i>Eunectes murinus</i>            | Boidae          | Well-known                                              |
| <i>Eunectes notaeus</i>            | Boidae          | Well-known                                              |
| <i>Exiliboa placata</i>            | Boidae          | Well-known                                              |
| <i>Ficimia hardyi</i>              | Colubridae      | Poorly-known                                            |
| <i>Ficimia olivacea</i>            | Colubridae      | Well-known                                              |
| <i>Ficimia publia</i>              | Colubridae      | Well-known                                              |
| <i>Ficimia streckeri</i>           | Colubridae      | Poorly-known                                            |
| <i>Ficimia variegata</i>           | Colubridae      | Poorly-known                                            |
| <i>Geagrass redimitus</i>          | Colubridae      | Well-known                                              |
| <i>Geophis anocularis</i>          | Dipsadidae      | Poorly-known                                            |

| <b>Neotropical snakes</b>      | <b>Families</b> | <b>Status of knowledge of geographical distribution</b> |
|--------------------------------|-----------------|---------------------------------------------------------|
| <i>Geophis betaniensis</i>     | Dipsadidae      | Poorly-known                                            |
| <i>Geophis bicolor</i>         | Dipsadidae      | Poorly-known                                            |
| <i>Geophis brachycephalus</i>  | Dipsadidae      | Well-known                                              |
| <i>Geophis cancellatus</i>     | Dipsadidae      | Well-known                                              |
| <i>Geophis championi</i>       | Dipsadidae      | Poorly-known                                            |
| <i>Geophis downsi</i>          | Dipsadidae      | Poorly-known                                            |
| <i>Geophis dubius</i>          | Dipsadidae      | Poorly-known                                            |
| <i>Geophis dugesii</i>         | Dipsadidae      | Poorly-known                                            |
| <i>Geophis fulvoguttatus</i>   | Dipsadidae      | Poorly-known                                            |
| <i>Geophis godmani</i>         | Dipsadidae      | Well-known                                              |
| <i>Geophis hoffmanni</i>       | Dipsadidae      | Poorly-known                                            |
| <i>Geophis immaculatus</i>     | Dipsadidae      | Well-known                                              |
| <i>Geophis laticinctus</i>     | Dipsadidae      | Poorly-known                                            |
| <i>Geophis latifrontalis</i>   | Dipsadidae      | Well-known                                              |
| <i>Geophis mutitorques</i>     | Dipsadidae      | Well-known                                              |
| <i>Geophis nasalis</i>         | Dipsadidae      | Well-known                                              |
| <i>Geophis nigroalbus</i>      | Dipsadidae      | Poorly-known                                            |
| <i>Geophis omiltemanus</i>     | Dipsadidae      | Poorly-known                                            |
| <i>Geophis rhodogaster</i>     | Dipsadidae      | Well-known                                              |
| <i>Geophis ruthveni</i>        | Dipsadidae      | Well-known                                              |
| <i>Geophis sallaei</i>         | Dipsadidae      | Poorly-known                                            |
| <i>Geophis semidoliatus</i>    | Dipsadidae      | Well-known                                              |
| <i>Geophis talamancae</i>      | Dipsadidae      | Well-known                                              |
| <i>Geophis tarascae</i>        | Dipsadidae      | Poorly-known                                            |
| <i>Geophis zeledoni</i>        | Dipsadidae      | Well-known                                              |
| <i>Gomesophis brasiliensis</i> | Dipsadidae      | Well-known                                              |
| <i>Gyalopion canum</i>         | Colubridae      | Poorly-known                                            |

| Neotropical snakes               | Families   | Status of knowledge of geographical distribution |
|----------------------------------|------------|--------------------------------------------------|
| <i>Gyalopion quadrangulare</i>   | Colubridae | Well-known                                       |
| <i>Haitiophis anomalus</i>       | Dipsadidae | Well-known                                       |
| <i>Helicops angulatus</i>        | Dipsadidae | Well-known                                       |
| <i>Helicops apiaka</i>           | Dipsadidae | Well-known                                       |
| <i>Helicops carinicaudus</i>     | Dipsadidae | Well-known                                       |
| <i>Helicops danieli</i>          | Dipsadidae | Well-known                                       |
| <i>Helicops gomesi</i>           | Dipsadidae | Well-known                                       |
| <i>Helicops hagmanni</i>         | Dipsadidae | Well-known                                       |
| <i>Helicops infrataeniatus</i>   | Dipsadidae | Well-known                                       |
| <i>Helicops leopardinus</i>      | Dipsadidae | Well-known                                       |
| <i>Helicops modestus</i>         | Dipsadidae | Well-known                                       |
| <i>Helicops pastazae</i>         | Dipsadidae | Well-known                                       |
| <i>Helicops petersi</i>          | Dipsadidae | Well-known                                       |
| <i>Helicops polylepis</i>        | Dipsadidae | Well-known                                       |
| <i>Helicops scalaris</i>         | Dipsadidae | Well-known                                       |
| <i>Helicops tapajonicus</i>      | Dipsadidae | Well-known                                       |
| <i>Helicops trivittatus</i>      | Dipsadidae | Well-known                                       |
| <i>Hydrodynastes bicinctus</i>   | Dipsadidae | Well-known                                       |
| <i>Hydrodynastes gigas</i>       | Dipsadidae | Well-known                                       |
| <i>Hydrodynastes melanogigas</i> | Dipsadidae | Well-known                                       |
| <i>Hydromorphus concolor</i>     | Dipsadidae | Well-known                                       |
| <i>Hydromorphus dunni</i>        | Dipsadidae | Poorly-known                                     |
| <i>Hydrops caesurus</i>          | Dipsadidae | Well-known                                       |
| <i>Hydrops martii</i>            | Dipsadidae | Well-known                                       |
| <i>Hydrops triangularis</i>      | Dipsadidae | Well-known                                       |
| <i>Hypsiglena tanzeri</i>        | Dipsadidae | Poorly-known                                     |
| <i>Hypsiglena torquata</i>       | Dipsadidae | Well-known                                       |



| <b>Neotropical snakes</b>         | <b>Families</b> | <b>Status of knowledge of geographical distribution</b> |
|-----------------------------------|-----------------|---------------------------------------------------------|
| <i>Hypsirhynchus ferox</i>        | Dipsadidae      | Well-known                                              |
| <i>Hypsirhynchus parvifrons</i>   | Dipsadidae      | Well-known                                              |
| <i>Ialtris agyrtes</i>            | Dipsadidae      | Well-known                                              |
| <i>Ialtris dorsalis</i>           | Dipsadidae      | Well-known                                              |
| <i>Ialtris haetianus</i>          | Dipsadidae      | Well-known                                              |
| <i>Ialtris parishi</i>            | Dipsadidae      | Well-known                                              |
| <i>Imantodes cenchoa</i>          | Dipsadidae      | Well-known                                              |
| <i>Imantodes gemmistratus</i>     | Dipsadidae      | Well-known                                              |
| <i>Imantodes inornatus</i>        | Dipsadidae      | Poorly-known                                            |
| <i>Imantodes lentiferus</i>       | Dipsadidae      | Well-known                                              |
| <i>Imantodes tenuissimus</i>      | Dipsadidae      | Well-known                                              |
| <i>Lachesis melanocephala</i>     | Viperidae       | Well-known                                              |
| <i>Lachesis muta</i>              | Viperidae       | Well-known                                              |
| <i>Lachesis stenophrys</i>        | Viperidae       | Well-known                                              |
| <i>Lampropeltis mexicana</i>      | Colubridae      | Poorly-known                                            |
| <i>Lampropeltis pyromelana</i>    | Colubridae      | Poorly-known                                            |
| <i>Lampropeltis ruthveni</i>      | Colubridae      | Poorly-known                                            |
| <i>Lampropeltis triangulum</i>    | Colubridae      | Well-known                                              |
| <i>Leptodeira annulata</i>        | Dipsadidae      | Well-known                                              |
| <i>Leptodeira frenata</i>         | Dipsadidae      | Well-known                                              |
| <i>Leptodeira maculata</i>        | Dipsadidae      | Well-known                                              |
| <i>Leptodeira nigrofasciata</i>   | Dipsadidae      | Well-known                                              |
| <i>Leptodeira punctata</i>        | Dipsadidae      | Well-known                                              |
| <i>Leptodeira rubricata</i>       | Dipsadidae      | Poorly-known                                            |
| <i>Leptodeira septentrionalis</i> | Dipsadidae      | Well-known                                              |
| <i>Leptodeira splendida</i>       | Dipsadidae      | Well-known                                              |
| <i>Leptodrymus pulcherrimus</i>   | Colubridae      | Well-known                                              |

| <b>Neotropical snakes</b>        | <b>Families</b> | <b>Status of knowledge of geographical distribution</b> |
|----------------------------------|-----------------|---------------------------------------------------------|
| <i>Leptophis ahaetulla</i>       | Colubridae      | Well-known                                              |
| <i>Leptophis cupreus</i>         | Colubridae      | Poorly-known                                            |
| <i>Leptophis depressirostris</i> | Colubridae      | Poorly-known                                            |
| <i>Leptophis diplotropis</i>     | Colubridae      | Well-known                                              |
| <i>Leptophis mexicanus</i>       | Colubridae      | Well-known                                              |
| <i>Leptophis modestus</i>        | Colubridae      | Poorly-known                                            |
| <i>Leptophis nebulosus</i>       | Colubridae      | Poorly-known                                            |
| <i>Leptophis riveti</i>          | Colubridae      | Poorly-known                                            |
| <i>Lioheterophis iheringi</i>    | Dipsadidae      | Poorly-known                                            |
| <i>Liotyphlops beui</i>          | Anomalepididae  | Well-known                                              |
| <i>Liotyphlops caissara</i>      | Anomalepididae  | Poorly-known                                            |
| <i>Liotyphlops schubarti</i>     | Anomalepididae  | Poorly-known                                            |
| <i>Liotyphlops ternetzii</i>     | Anomalepididae  | Well-known                                              |
| <i>Liotyphlops trefauti</i>      | Anomalepididae  | Poorly-known                                            |
| <i>Liotyphlops wilderi</i>       | Anomalepididae  | Well-known                                              |
| <i>Loxocemus bicolor</i>         | Loxocemidae     | Well-known                                              |
| <i>Lygophis anomalus</i>         | Dipsadidae      | Well-known                                              |
| <i>Lygophis dilepis</i>          | Dipsadidae      | Well-known                                              |
| <i>Lygophis flavifrenatus</i>    | Dipsadidae      | Well-known                                              |
| <i>Lygophis lineatus</i>         | Dipsadidae      | Well-known                                              |
| <i>Lygophis meridionalis</i>     | Dipsadidae      | Well-known                                              |
| <i>Lygophis paucidens</i>        | Dipsadidae      | Well-known                                              |
| <i>Magliophis exiguum</i>        | Dipsadidae      | Well-known                                              |
| <i>Manolepis putnami</i>         | Dipsadidae      | Well-known                                              |
| <i>Mastigodryas amarali</i>      | Colubridae      | Poorly-known                                            |
| <i>Mastigodryas bifossatus</i>   | Colubridae      | Well-known                                              |
| <i>Mastigodryas boddaerti</i>    | Colubridae      | Well-known                                              |

| Neotropical snakes              | Families   | Status of knowledge of geographical distribution |
|---------------------------------|------------|--------------------------------------------------|
| <i>Mastigodryas cliftoni</i>    | Colubridae | Well-known                                       |
| <i>Mastigodryas danieli</i>     | Colubridae | Poorly-known                                     |
| <i>Mastigodryas heathii</i>     | Colubridae | Poorly-known                                     |
| <i>Mastigodryas melanolomus</i> | Colubridae | Well-known                                       |
| <i>Mastigodryas moratoi</i>     | Colubridae | Well-known                                       |
| <i>Mastigodryas pleei</i>       | Colubridae | Well-known                                       |
| <i>Mastigodryas pulchriceps</i> | Colubridae | Poorly-known                                     |
| <i>Mastigodryas reticulatus</i> | Colubridae | Poorly-known                                     |
| <i>Micruroides euryxanthus</i>  | Elapidae   | Poorly-known                                     |
| <i>Micrurus albicinctus</i>     | Elapidae   | Well-known                                       |
| <i>Micrurus alleni</i>          | Elapidae   | Well-known                                       |
| <i>Micrurus altirostris</i>     | Elapidae   | Well-known                                       |
| <i>Micrurus ancoralis</i>       | Elapidae   | Poorly-known                                     |
| <i>Micrurus annellatus</i>      | Elapidae   | Well-known                                       |
| <i>Micrurus averyi</i>          | Elapidae   | Well-known                                       |
| <i>Micrurus baliocoryphus</i>   | Elapidae   | Well-known                                       |
| <i>Micrurus bocourti</i>        | Elapidae   | Poorly-known                                     |
| <i>Micrurus brasiliensis</i>    | Elapidae   | Well-known                                       |
| <i>Micrurus browni</i>          | Elapidae   | Well-known                                       |
| <i>Micrurus clarki</i>          | Elapidae   | Poorly-known                                     |
| <i>Micrurus collaris</i>        | Elapidae   | Well-known                                       |
| <i>Micrurus corallinus</i>      | Elapidae   | Well-known                                       |
| <i>Micrurus decoratus</i>       | Elapidae   | Well-known                                       |
| <i>Micrurus diana</i>           | Elapidae   | Well-known                                       |
| <i>Micrurus diastema</i>        | Elapidae   | Well-known                                       |
| <i>Micrurus distans</i>         | Elapidae   | Well-known                                       |
| <i>Micrurus dumerilii</i>       | Elapidae   | Poorly-known                                     |

| Neotropical snakes            | Families | Status of knowledge of geographical distribution |
|-------------------------------|----------|--------------------------------------------------|
| <i>Micrurus elegans</i>       | Elapidae | Well-known                                       |
| <i>Micrurus ephippifer</i>    | Elapidae | Well-known                                       |
| <i>Micrurus filiformis</i>    | Elapidae | Well-known                                       |
| <i>Micrurus frontalis</i>     | Elapidae | Well-known                                       |
| <i>Micrurus hemprichii</i>    | Elapidae | Well-known                                       |
| <i>Micrurus ibiboboca</i>     | Elapidae | Well-known                                       |
| <i>Micrurus isozonus</i>      | Elapidae | Well-known                                       |
| <i>Micrurus langsdorffi</i>   | Elapidae | Well-known                                       |
| <i>Micrurus laticollaris</i>  | Elapidae | Poorly-known                                     |
| <i>Micrurus latifasciatus</i> | Elapidae | Poorly-known                                     |
| <i>Micrurus lemniscatus</i>   | Elapidae | Well-known                                       |
| <i>Micrurus mertensi</i>      | Elapidae | Poorly-known                                     |
| <i>Micrurus mipartitus</i>    | Elapidae | Well-known                                       |
| <i>Micrurus narduccii</i>     | Elapidae | Well-known                                       |
| <i>Micrurus nattereri</i>     | Elapidae | Well-known                                       |
| <i>Micrurus nigrocinctus</i>  | Elapidae | Well-known                                       |
| <i>Micrurus obscurus</i>      | Elapidae | Poorly-known                                     |
| <i>Micrurus ornatissimus</i>  | Elapidae | Poorly-known                                     |
| <i>Micrurus pacaraimae</i>    | Elapidae | Poorly-known                                     |
| <i>Micrurus paraensis</i>     | Elapidae | Well-known                                       |
| <i>Micrurus peruvianus</i>    | Elapidae | Poorly-known                                     |
| <i>Micrurus potyguara</i>     | Elapidae | Well-known                                       |
| <i>Micrurus proximans</i>     | Elapidae | Poorly-known                                     |
| <i>Micrurus psyches</i>       | Elapidae | Well-known                                       |
| <i>Micrurus putumayensis</i>  | Elapidae | Poorly-known                                     |
| <i>Micrurus pyrrhocryptus</i> | Elapidae | Well-known                                       |
| <i>Micrurus remotus</i>       | Elapidae | Poorly-known                                     |

| <b>Neotropical snakes</b>     | <b>Families</b>  | <b>Status of knowledge of geographical distribution</b> |
|-------------------------------|------------------|---------------------------------------------------------|
| <i>Micrurus ruatanus</i>      | Elapidae         | Well-known                                              |
| <i>Micrurus scutiventris</i>  | Elapidae         | Well-known                                              |
| <i>Micrurus serranus</i>      | Elapidae         | Well-known                                              |
| <i>Micrurus silviae</i>       | Elapidae         | Well-known                                              |
| <i>Micrurus spixii</i>        | Elapidae         | Well-known                                              |
| <i>Micrurus steindachneri</i> | Elapidae         | Poorly-known                                            |
| <i>Micrurus surinamensis</i>  | Elapidae         | Well-known                                              |
| <i>Micrurus tschudii</i>      | Elapidae         | Poorly-known                                            |
| <i>Mitophis leptipileptus</i> | Leptotyphlopidae | Well-known                                              |
| <i>Mitophis pyrites</i>       | Leptotyphlopidae | Well-known                                              |
| <i>Mixcoatlus barbouri</i>    | Viperidae        | Poorly-known                                            |
| <i>Mixcoatlus melanurus</i>   | Viperidae        | Poorly-known                                            |
| <i>Mussurana bicolor</i>      | Dipsadidae       | Well-known                                              |
| <i>Mussurana montana</i>      | Dipsadidae       | Well-known                                              |
| <i>Mussurana quimi</i>        | Dipsadidae       | Well-known                                              |
| <i>Nerodia rhombifer</i>      | Natricidae       | Poorly-known                                            |
| <i>Ninia atrata</i>           | Dipsadidae       | Well-known                                              |
| <i>Ninia celata</i>           | Dipsadidae       | Poorly-known                                            |
| <i>Ninia diademata</i>        | Dipsadidae       | Well-known                                              |
| <i>Ninia espinali</i>         | Dipsadidae       | Poorly-known                                            |
| <i>Ninia hudsoni</i>          | Dipsadidae       | Well-known                                              |
| <i>Ninia maculata</i>         | Dipsadidae       | Well-known                                              |
| <i>Ninia psephota</i>         | Dipsadidae       | Well-known                                              |
| <i>Ninia sebae</i>            | Dipsadidae       | Well-known                                              |
| <i>Nothopsis rugosus</i>      | Dipsadidae       | Poorly-known                                            |
| <i>Opheodrys aestivus</i>     | Colubridae       | Poorly-known                                            |
| <i>Oxybelis aeneus</i>        | Colubridae       | Well-known                                              |

| Neotropical snakes              | Families   | Status of knowledge of geographical distribution |
|---------------------------------|------------|--------------------------------------------------|
| <i>Oxybelis brevirostris</i>    | Colubridae | Well-known                                       |
| <i>Oxybelis fulgidus</i>        | Colubridae | Well-known                                       |
| <i>Oxybelis wilsoni</i>         | Colubridae | Well-known                                       |
| <i>Oxyrhopus clathratus</i>     | Dipsadidae | Well-known                                       |
| <i>Oxyrhopus doliatus</i>       | Dipsadidae | Poorly-known                                     |
| <i>Oxyrhopus fitzingeri</i>     | Dipsadidae | Poorly-known                                     |
| <i>Oxyrhopus formosus</i>       | Dipsadidae | Well-known                                       |
| <i>Oxyrhopus guibei</i>         | Dipsadidae | Well-known                                       |
| <i>Oxyrhopus leucomelas</i>     | Dipsadidae | Poorly-known                                     |
| <i>Oxyrhopus marcapatae</i>     | Dipsadidae | Poorly-known                                     |
| <i>Oxyrhopus melanogenys</i>    | Dipsadidae | Well-known                                       |
| <i>Oxyrhopus occipitalis</i>    | Dipsadidae | Well-known                                       |
| <i>Oxyrhopus petolarius</i>     | Dipsadidae | Well-known                                       |
| <i>Oxyrhopus rhombifer</i>      | Dipsadidae | Well-known                                       |
| <i>Oxyrhopus sp.</i>            | Dipsadidae | Well-known                                       |
| <i>Oxyrhopus trigeminus</i>     | Dipsadidae | Well-known                                       |
| <i>Oxyrhopus vanidicus</i>      | Dipsadidae | Well-known                                       |
| <i>Pantherophis emoryi</i>      | Colubridae | Poorly-known                                     |
| <i>Paraphimophis rusticus</i>   | Dipsadidae | Well-known                                       |
| <i>Phalotris bilineatus</i>     | Dipsadidae | Well-known                                       |
| <i>Phalotris concolor</i>       | Dipsadidae | Well-known                                       |
| <i>Phalotris cuyanus</i>        | Dipsadidae | Poorly-known                                     |
| <i>Phalotris labiomaculatus</i> | Dipsadidae | Well-known                                       |
| <i>Phalotris lativittatus</i>   | Dipsadidae | Well-known                                       |
| <i>Phalotris lemniscatus</i>    | Dipsadidae | Well-known                                       |
| <i>Phalotris matogrossensis</i> | Dipsadidae | Well-known                                       |
| <i>Phalotris mertensi</i>       | Dipsadidae | Well-known                                       |

| Neotropical snakes                 | Families   | Status of knowledge of geographical distribution |
|------------------------------------|------------|--------------------------------------------------|
| <i>Phalotris multipunctatus</i>    | Dipsadidae | Poorly-known                                     |
| <i>Phalotris nasutus</i>           | Dipsadidae | Well-known                                       |
| <i>Phalotris nigrilatus</i>        | Dipsadidae | Well-known                                       |
| <i>Phalotris reticulatus</i>       | Dipsadidae | Poorly-known                                     |
| <i>Phalotris sansebastiani</i>     | Dipsadidae | Poorly-known                                     |
| <i>Phalotris tricolor</i>          | Dipsadidae | Well-known                                       |
| <i>Philodryas aestiva</i>          | Dipsadidae | Well-known                                       |
| <i>Philodryas agassizii</i>        | Dipsadidae | Well-known                                       |
| <i>Philodryas argentea</i>         | Dipsadidae | Well-known                                       |
| <i>Philodryas arnaldoi</i>         | Dipsadidae | Well-known                                       |
| <i>Philodryas baroni</i>           | Dipsadidae | Well-known                                       |
| <i>Philodryas boliviana</i>        | Dipsadidae | Poorly-known                                     |
| <i>Philodryas chamissonis</i>      | Dipsadidae | Well-known                                       |
| <i>Philodryas georgeboulengeri</i> | Dipsadidae | Well-known                                       |
| <i>Philodryas laticeps</i>         | Dipsadidae | Well-known                                       |
| <i>Philodryas livida</i>           | Dipsadidae | Well-known                                       |
| <i>Philodryas mattogrossensis</i>  | Dipsadidae | Well-known                                       |
| <i>Philodryas nattereri</i>        | Dipsadidae | Well-known                                       |
| <i>Philodryas olfersii</i>         | Dipsadidae | Well-known                                       |
| <i>Philodryas patagoniensis</i>    | Dipsadidae | Well-known                                       |
| <i>Philodryas psammophidea</i>     | Dipsadidae | Well-known                                       |
| <i>Philodryas simonsii</i>         | Dipsadidae | Poorly-known                                     |
| <i>Philodryas tachymenoides</i>    | Dipsadidae | Poorly-known                                     |
| <i>Philodryas trilineata</i>       | Dipsadidae | Well-known                                       |
| <i>Philodryas varia</i>            | Dipsadidae | Well-known                                       |
| <i>Philodryas viridissima</i>      | Dipsadidae | Well-known                                       |
| <i>Phimophis guerini</i>           | Dipsadidae | Well-known                                       |

| <b>Neotropical snakes</b>        | <b>Families</b> | <b>Status of knowledge of geographical distribution</b> |
|----------------------------------|-----------------|---------------------------------------------------------|
| <i>Phimophis guianensis</i>      | Dipsadidae      | Well-known                                              |
| <i>Phimophis vittatus</i>        | Dipsadidae      | Well-known                                              |
| <i>Phrynonax poecilonotus</i>    | Colubridae      | Well-known                                              |
| <i>Phrynonax sexcarinatus</i>    | Colubridae      | Well-known                                              |
| <i>Phyllorhynchus browni</i>     | Colubridae      | Well-known                                              |
| <i>Phyllorhynchus decurtatus</i> | Colubridae      | Poorly-known                                            |
| <i>Pituophis catenifer</i>       | Colubridae      | Poorly-known                                            |
| <i>Pituophis deppei</i>          | Colubridae      | Well-known                                              |
| <i>Pituophis lineaticollis</i>   | Colubridae      | Well-known                                              |
| <i>Plesiodipsas perijanensis</i> | Dipsadidae      | Poorly-known                                            |
| <i>Pliocercus elapoides</i>      | Dipsadidae      | Well-known                                              |
| <i>Pliocercus euryzonus</i>      | Dipsadidae      | Poorly-known                                            |
| <i>Porthidium dunni</i>          | Viperidae       | Well-known                                              |
| <i>Porthidium lansbergii</i>     | Viperidae       | Poorly-known                                            |
| <i>Porthidium nasutum</i>        | Viperidae       | Well-known                                              |
| <i>Porthidium ophryomegas</i>    | Viperidae       | Well-known                                              |
| <i>Porthidium porrasi</i>        | Viperidae       | Poorly-known                                            |
| <i>Porthidium yucatanicum</i>    | Viperidae       | Well-known                                              |
| <i>Pseudalsophis elegans</i>     | Dipsadidae      | Well-known                                              |
| <i>Pseudelaphe flavirufa</i>     | Colubridae      | Poorly-known                                            |
| <i>Pseudoboa coronata</i>        | Dipsadidae      | Well-known                                              |
| <i>Pseudoboa haasi</i>           | Dipsadidae      | Well-known                                              |
| <i>Pseudoboa martinsi</i>        | Dipsadidae      | Well-known                                              |
| <i>Pseudoboa newwiedii</i>       | Dipsadidae      | Well-known                                              |
| <i>Pseudoboa nigra</i>           | Dipsadidae      | Well-known                                              |
| <i>Pseudoboa serrana</i>         | Dipsadidae      | Well-known                                              |
| <i>Pseudoeryx plicatilis</i>     | Dipsadidae      | Well-known                                              |



| <b>Neotropical snakes</b>            | <b>Families</b>  | <b>Status of knowledge of geographical distribution</b> |
|--------------------------------------|------------------|---------------------------------------------------------|
| <i>Pseudoeryx relictualis</i>        | Dipsadidae       | Well-known                                              |
| <i>Pseudoficimia frontalis</i>       | Colubridae       | Well-known                                              |
| <i>Pseudoleptodeira latifasciata</i> | Dipsadidae       | Well-known                                              |
| <i>Pseudotomodon trigonatus</i>      | Dipsadidae       | Well-known                                              |
| <i>Psomophis genimaculatus</i>       | Dipsadidae       | Well-known                                              |
| <i>Psomophis joberti</i>             | Dipsadidae       | Well-known                                              |
| <i>Psomophis obtusus</i>             | Dipsadidae       | Well-known                                              |
| <i>Ptychophis flavovirgatus</i>      | Dipsadidae       | Well-known                                              |
| <i>Rena dulcis</i>                   | Leptotyphlopidae | Poorly-known                                            |
| <i>Rena humilis</i>                  | Leptotyphlopidae | Poorly-known                                            |
| <i>Rena maxima</i>                   | Leptotyphlopidae | Well-known                                              |
| <i>Rena unguirostris</i>             | Leptotyphlopidae | Poorly-known                                            |
| <i>Rhachidelus brazili</i>           | Dipsadidae       | Well-known                                              |
| <i>Rhadinaea calligaster</i>         | Dipsadidae       | Well-known                                              |
| <i>Rhadinaea decorata</i>            | Dipsadidae       | Well-known                                              |
| <i>Rhadinaea fulvivittis</i>         | Dipsadidae       | Well-known                                              |
| <i>Rhadinaea gaigeae</i>             | Dipsadidae       | Poorly-known                                            |
| <i>Rhadinaea hesperia</i>            | Dipsadidae       | Poorly-known                                            |
| <i>Rhadinaea laureata</i>            | Dipsadidae       | Poorly-known                                            |
| <i>Rhadinaea omiltemana</i>          | Dipsadidae       | Poorly-known                                            |
| <i>Rhadinaea posadasi</i>            | Dipsadidae       | Well-known                                              |
| <i>Rhadinaea pulveriventris</i>      | Dipsadidae       | Poorly-known                                            |
| <i>Rhadinaea quinquelineata</i>      | Dipsadidae       | Poorly-known                                            |
| <i>Rhadinaea taeniata</i>            | Dipsadidae       | Well-known                                              |
| <i>Rhadinella godmani</i>            | Dipsadidae       | Well-known                                              |
| <i>Rhadinella hannsteini</i>         | Dipsadidae       | Poorly-known                                            |
| <i>Rhadinella hempsteadae</i>        | Dipsadidae       | Well-known                                              |

| <b>Neotropical snakes</b>             | <b>Families</b>  | <b>Status of knowledge of geographical distribution</b> |
|---------------------------------------|------------------|---------------------------------------------------------|
| <i>Rhadinella kanalchutchan</i>       | Dipsadidae       | Poorly-known                                            |
| <i>Rhadinella kinkelini</i>           | Dipsadidae       | Well-known                                              |
| <i>Rhadinella lachrymans</i>          | Dipsadidae       | Poorly-known                                            |
| <i>Rhadinella montecristi</i>         | Dipsadidae       | Poorly-known                                            |
| <i>Rhadinella pilonaorum</i>          | Dipsadidae       | Poorly-known                                            |
| <i>Rhadinella schistosa</i>           | Dipsadidae       | Poorly-known                                            |
| <i>Rhadinella seperaster</i>          | Dipsadidae       | Poorly-known                                            |
| <i>Rhinobothryum bovallii</i>         | Colubridae       | Poorly-known                                            |
| <i>Rhinobothryum lentiginosum</i>     | Colubridae       | Well-known                                              |
| <i>Rhinocheilus lecontei</i>          | Colubridae       | Well-known                                              |
| <i>Rodriguesophis chui</i>            | Dipsadidae       | Well-known                                              |
| <i>Rodriguesophis iglesiasi</i>       | Dipsadidae       | Well-known                                              |
| <i>Rodriguesophis scriptorcibatus</i> | Dipsadidae       | Well-known                                              |
| <i>Salvadora bairdi</i>               | Colubridae       | Well-known                                              |
| <i>Salvadora deserticola</i>          | Colubridae       | Poorly-known                                            |
| <i>Salvadora grahamiae</i>            | Colubridae       | Poorly-known                                            |
| <i>Salvadora hexalepis</i>            | Colubridae       | Poorly-known                                            |
| <i>Salvadora intermedia</i>           | Colubridae       | Well-known                                              |
| <i>Salvadora lemniscata</i>           | Colubridae       | Poorly-known                                            |
| <i>Salvadora mexicana</i>             | Colubridae       | Well-known                                              |
| <i>Saphenophis boursieri</i>          | Dipsadidae       | Poorly-known                                            |
| <i>Scaphiodontophis annulatus</i>     | Colubridae       | Well-known                                              |
| <i>Scaphiodontophis venustissimus</i> | Colubridae       | Poorly-known                                            |
| <i>Scolecophis atrocinctus</i>        | Colubridae       | Poorly-known                                            |
| <i>Senticolis triaspis</i>            | Colubridae       | Well-known                                              |
| <i>Siagonodon acutirostris</i>        | Leptotyphlopidae | Poorly-known                                            |
| <i>Siagonodon borrichianus</i>        | Leptotyphlopidae | Poorly-known                                            |

| Neotropical snakes                   | Families         | Status of knowledge of geographical distribution |
|--------------------------------------|------------------|--------------------------------------------------|
| <i>Siagonodon cupinensis</i>         | Leptotyphlopidae | Poorly-known                                     |
| <i>Siagonodon septemstriatus</i>     | Leptotyphlopidae | Poorly-known                                     |
| <i>Sibon annulatus</i>               | Dipsadidae       | Poorly-known                                     |
| <i>Sibon anthracops</i>              | Dipsadidae       | Poorly-known                                     |
| <i>Sibon carri</i>                   | Dipsadidae       | Poorly-known                                     |
| <i>Sibon dimidiatus</i>              | Dipsadidae       | Well-known                                       |
| <i>Sibon longifrenis</i>             | Dipsadidae       | Poorly-known                                     |
| <i>Sibon nebulatus</i>               | Dipsadidae       | Well-known                                       |
| <i>Sibon sanniolus</i>               | Dipsadidae       | Well-known                                       |
| <i>Sibynomorphus lavillai</i>        | Dipsadidae       | Well-known                                       |
| <i>Sibynomorphus mikanii</i>         | Dipsadidae       | Well-known                                       |
| <i>Sibynomorphus neuwiedi</i>        | Dipsadidae       | Well-known                                       |
| <i>Sibynomorphus oneilli</i>         | Dipsadidae       | Well-known                                       |
| <i>Sibynomorphus petersi</i>         | Dipsadidae       | Poorly-known                                     |
| <i>Sibynomorphus turgidus</i>        | Dipsadidae       | Well-known                                       |
| <i>Sibynomorphus vagus</i>           | Dipsadidae       | Poorly-known                                     |
| <i>Sibynomorphus ventrimaculatus</i> | Dipsadidae       | Well-known                                       |
| <i>Simophis rhinostoma</i>           | Colubridae       | Well-known                                       |
| <i>Siphlophis cervinus</i>           | Dipsadidae       | Well-known                                       |
| <i>Siphlophis compressus</i>         | Dipsadidae       | Well-known                                       |
| <i>Siphlophis leucocephalus</i>      | Dipsadidae       | Well-known                                       |
| <i>Siphlophis longicaudatus</i>      | Dipsadidae       | Well-known                                       |
| <i>Siphlophis pulcher</i>            | Dipsadidae       | Well-known                                       |
| <i>Siphlophis worontzowi</i>         | Dipsadidae       | Well-known                                       |
| <i>Sonora aemula</i>                 | Colubridae       | Poorly-known                                     |
| <i>Sonora michoacanensis</i>         | Colubridae       | Poorly-known                                     |
| <i>Sordellina punctata</i>           | Dipsadidae       | Well-known                                       |

| Neotropical snakes                   | Families   | Status of knowledge of geographical distribution |
|--------------------------------------|------------|--------------------------------------------------|
| <i>Spilotes pullatus</i>             | Colubridae | Well-known                                       |
| <i>Spilotes sulphureus</i>           | Colubridae | Well-known                                       |
| <i>Stenorrhina degenhardtii</i>      | Colubridae | Well-known                                       |
| <i>Stenorrhina freminvillei</i>      | Colubridae | Well-known                                       |
| <i>Storeria dekayi</i>               | Natricidae | Well-known                                       |
| <i>Storeria hidalgoensis</i>         | Natricidae | Well-known                                       |
| <i>Storeria storerioides</i>         | Natricidae | Well-known                                       |
| <i>Symphimus leucostomus</i>         | Colubridae | Poorly-known                                     |
| <i>Symphimus mayae</i>               | Colubridae | Well-known                                       |
| <i>Sympholis lippiens</i>            | Colubridae | Poorly-known                                     |
| <i>Synophis calamitus</i>            | Dipsadidae | Poorly-known                                     |
| <i>Synophis lasallei</i>             | Dipsadidae | Poorly-known                                     |
| <i>Tachymenis chilensis</i>          | Dipsadidae | Well-known                                       |
| <i>Tachymenis peruviana</i>          | Dipsadidae | Well-known                                       |
| <i>Taeniophallus affinis</i>         | Dipsadidae | Well-known                                       |
| <i>Taeniophallus bilineatus</i>      | Dipsadidae | Well-known                                       |
| <i>Taeniophallus brevirostris</i>    | Dipsadidae | Well-known                                       |
| <i>Taeniophallus nicagus</i>         | Dipsadidae | Well-known                                       |
| <i>Taeniophallus occipitalis</i>     | Dipsadidae | Well-known                                       |
| <i>Taeniophallus persimilis</i>      | Dipsadidae | Well-known                                       |
| <i>Taeniophallus poecilopogon</i>    | Dipsadidae | Well-known                                       |
| <i>Taeniophallus quadriocellatus</i> | Dipsadidae | Well-known                                       |
| <i>Tantalophis discolor</i>          | Dipsadidae | Poorly-known                                     |
| <i>Tantilla alticola</i>             | Colubridae | Poorly-known                                     |
| <i>Tantilla armillata</i>            | Colubridae | Well-known                                       |
| <i>Tantilla atriceps</i>             | Colubridae | Poorly-known                                     |
| <i>Tantilla bocourti</i>             | Colubridae | Well-known                                       |

| Neotropical snakes                | Families   | Status of knowledge of geographical distribution |
|-----------------------------------|------------|--------------------------------------------------|
| <i>Tantilla boipiranga</i>        | Colubridae | Well-known                                       |
| <i>Tantilla brevicauda</i>        | Colubridae | Poorly-known                                     |
| <i>Tantilla calamarina</i>        | Colubridae | Poorly-known                                     |
| <i>Tantilla cuniculator</i>       | Colubridae | Well-known                                       |
| <i>Tantilla deppei</i>            | Colubridae | Poorly-known                                     |
| <i>Tantilla impensa</i>           | Colubridae | Poorly-known                                     |
| <i>Tantilla jani</i>              | Colubridae | Well-known                                       |
| <i>Tantilla lempira</i>           | Colubridae | Poorly-known                                     |
| <i>Tantilla marcovani</i>         | Colubridae | Poorly-known                                     |
| <i>Tantilla melanocephala</i>     | Colubridae | Well-known                                       |
| <i>Tantilla miyatai</i>           | Colubridae | Poorly-known                                     |
| <i>Tantilla moesta</i>            | Colubridae | Poorly-known                                     |
| <i>Tantilla oaxacae</i>           | Colubridae | Poorly-known                                     |
| <i>Tantilla reticulata</i>        | Colubridae | Poorly-known                                     |
| <i>Tantilla rubra</i>             | Colubridae | Poorly-known                                     |
| <i>Tantilla schistosa</i>         | Colubridae | Well-known                                       |
| <i>Tantilla supracincta</i>       | Colubridae | Poorly-known                                     |
| <i>Tantilla tayrae</i>            | Colubridae | Poorly-known                                     |
| <i>Tantilla vermiformis</i>       | Colubridae | Poorly-known                                     |
| <i>Tantilla vulcani</i>           | Colubridae | Well-known                                       |
| <i>Tantilla wilcoxi</i>           | Colubridae | Poorly-known                                     |
| <i>Tantilla yaquia</i>            | Colubridae | Poorly-known                                     |
| <i>Tantillita canula</i>          | Colubridae | Poorly-known                                     |
| <i>Tantillita lintoni</i>         | Colubridae | Poorly-known                                     |
| <i>Thamnodynastes almae</i>       | Dipsadidae | Well-known                                       |
| <i>Thamnodynastes chaquensis</i>  | Dipsadidae | Well-known                                       |
| <i>Thamnodynastes gambotensis</i> | Dipsadidae | Poorly-known                                     |

| Neotropical snakes                 | Families   | Status of knowledge of geographical distribution |
|------------------------------------|------------|--------------------------------------------------|
| <i>Thamnodynastes hypoconia</i>    | Dipsadidae | Well-known                                       |
| <i>Thamnodynastes lanei</i>        | Dipsadidae | Well-known                                       |
| <i>Thamnodynastes longicaudus</i>  | Dipsadidae | Well-known                                       |
| <i>Thamnodynastes nattereri</i>    | Dipsadidae | Well-known                                       |
| <i>Thamnodynastes pallidus</i>     | Dipsadidae | Well-known                                       |
| <i>Thamnodynastes ramonriveroi</i> | Dipsadidae | Well-known                                       |
| <i>Thamnodynastes rutilus</i>      | Dipsadidae | Well-known                                       |
| <i>Thamnodynastes sertanejo</i>    | Dipsadidae | Well-known                                       |
| <i>Thamnodynastes strigatus</i>    | Dipsadidae | Well-known                                       |
| <i>Thamnophis bogerti</i>          | Natricidae | Poorly-known                                     |
| <i>Thamnophis chrysocephalus</i>   | Natricidae | Well-known                                       |
| <i>Thamnophis cyrtopsis</i>        | Natricidae | Well-known                                       |
| <i>Thamnophis elegans</i>          | Natricidae | Well-known                                       |
| <i>Thamnophis eques</i>            | Natricidae | Well-known                                       |
| <i>Thamnophis fulvus</i>           | Natricidae | Well-known                                       |
| <i>Thamnophis godmani</i>          | Natricidae | Well-known                                       |
| <i>Thamnophis lineri</i>           | Natricidae | Poorly-known                                     |
| <i>Thamnophis marcianus</i>        | Natricidae | Well-known                                       |
| <i>Thamnophis melanogaster</i>     | Natricidae | Well-known                                       |
| <i>Thamnophis mendax</i>           | Natricidae | Well-known                                       |
| <i>Thamnophis nigronuchalis</i>    | Natricidae | Well-known                                       |
| <i>Thamnophis proximus</i>         | Natricidae | Well-known                                       |
| <i>Thamnophis rufipunctatus</i>    | Natricidae | Well-known                                       |
| <i>Thamnophis sauritus</i>         | Natricidae | Well-known                                       |
| <i>Thamnophis scalaris</i>         | Natricidae | Well-known                                       |
| <i>Thamnophis scaliger</i>         | Natricidae | Poorly-known                                     |
| <i>Thamnophis sumichrasti</i>      | Natricidae | Poorly-known                                     |

| <b>Neotropical snakes</b>        | <b>Families</b>  | <b>Status of knowledge of geographical distribution</b> |
|----------------------------------|------------------|---------------------------------------------------------|
| <i>Thamnophis valida</i>         | Natricidae       | Well-known                                              |
| <i>Tomodon dorsatus</i>          | Dipsadidae       | Well-known                                              |
| <i>Tomodon ocellatus</i>         | Dipsadidae       | Well-known                                              |
| <i>Trachyboa boulengeri</i>      | Tropidophiidae   | Poorly-known                                            |
| <i>Tretanorhinus nigroluteus</i> | Dipsadidae       | Well-known                                              |
| <i>Tretanorhinus variabilis</i>  | Dipsadidae       | Well-known                                              |
| <i>Trilepida anthracina</i>      | Leptotyphlopidae | Poorly-known                                            |
| <i>Trilepida brasiliensis</i>    | Leptotyphlopidae | Well-known                                              |
| <i>Trilepida dimidiata</i>       | Leptotyphlopidae | Well-known                                              |
| <i>Trilepida fuliginosa</i>      | Leptotyphlopidae | Well-known                                              |
| <i>Trilepida jani</i>            | Leptotyphlopidae | Well-known                                              |
| <i>Trilepida joshuai</i>         | Leptotyphlopidae | Poorly-known                                            |
| <i>Trilepida koppesi</i>         | Leptotyphlopidae | Well-known                                              |
| <i>Trilepida macrolepis</i>      | Leptotyphlopidae | Well-known                                              |
| <i>Trilepida salgueiroi</i>      | Leptotyphlopidae | Well-known                                              |
| <i>Trimetopon gracile</i>        | Dipsadidae       | Well-known                                              |
| <i>Trimetopon pliolepis</i>      | Dipsadidae       | Well-known                                              |
| <i>Trimetopon slevini</i>        | Dipsadidae       | Poorly-known                                            |
| <i>Trimorphodon biscutatus</i>   | Colubridae       | Well-known                                              |
| <i>Trimorphodon tau</i>          | Colubridae       | Well-known                                              |
| <i>Tropidodipsas annulifera</i>  | Dipsadidae       | Well-known                                              |
| <i>Tropidodipsas fasciata</i>    | Dipsadidae       | Poorly-known                                            |
| <i>Tropidodipsas fischeri</i>    | Dipsadidae       | Well-known                                              |
| <i>Tropidodipsas philippii</i>   | Dipsadidae       | Well-known                                              |
| <i>Tropidodipsas sartorii</i>    | Dipsadidae       | Well-known                                              |
| <i>Tropidodryas serra</i>        | Dipsadidae       | Well-known                                              |
| <i>Tropidodryas striaticeps</i>  | Dipsadidae       | Well-known                                              |

| Neotropical snakes              | Families       | Status of knowledge of geographical distribution |
|---------------------------------|----------------|--------------------------------------------------|
| <i>Tropidophis canus</i>        | Tropidophiidae | Well-known                                       |
| <i>Tropidophis grapiuna</i>     | Tropidophiidae | Well-known                                       |
| <i>Tropidophis haetianus</i>    | Tropidophiidae | Well-known                                       |
| <i>Tropidophis hendersoni</i>   | Tropidophiidae | Well-known                                       |
| <i>Tropidophis maculatus</i>    | Tropidophiidae | Well-known                                       |
| <i>Tropidophis melanurus</i>    | Tropidophiidae | Well-known                                       |
| <i>Tropidophis pardalis</i>     | Tropidophiidae | Well-known                                       |
| <i>Tropidophis paucisquamis</i> | Tropidophiidae | Well-known                                       |
| <i>Tropidophis pilsbryi</i>     | Tropidophiidae | Well-known                                       |
| <i>Tropidophis preciosus</i>    | Tropidophiidae | Well-known                                       |
| <i>Tropidophis semicinctus</i>  | Tropidophiidae | Well-known                                       |
| <i>Tropidophis taczanowskyi</i> | Tropidophiidae | Well-known                                       |
| <i>Tropidophis wrighti</i>      | Tropidophiidae | Well-known                                       |
| <i>Typhlops squamosus</i>       | Anomalepididae | Well-known                                       |
| <i>Typhlops biminiensis</i>     | Typhlopidae    | Well-known                                       |
| <i>Typhlops capitulatus</i>     | Typhlopidae    | Well-known                                       |
| <i>Typhlops eperopeus</i>       | Typhlopidae    | Well-known                                       |
| <i>Typhlops gonavensis</i>      | Typhlopidae    | Well-known                                       |
| <i>Typhlops granti</i>          | Typhlopidae    | Well-known                                       |
| <i>Typhlops hectus</i>          | Typhlopidae    | Well-known                                       |
| <i>Typhlops hypomethes</i>      | Typhlopidae    | Well-known                                       |
| <i>Typhlops lumbricalis</i>     | Typhlopidae    | Well-known                                       |
| <i>Typhlops microstomus</i>     | Typhlopidae    | Poorly-known                                     |
| <i>Typhlops monastus</i>        | Typhlopidae    | Well-known                                       |
| <i>Typhlops platycephalus</i>   | Typhlopidae    | Well-known                                       |
| <i>Typhlops pusillus</i>        | Typhlopidae    | Well-known                                       |
| <i>Typhlops reticulatus</i>     | Typhlopidae    | Poorly-known                                     |



| Neotropical snakes            | Families    | Status of knowledge of geographical distribution |
|-------------------------------|-------------|--------------------------------------------------|
| <i>Typhlops rostellatus</i>   | Typhlopidae | Well-known                                       |
| <i>Typhlops schwartzi</i>     | Typhlopidae | Well-known                                       |
| <i>Typhlops sulcatus</i>      | Typhlopidae | Well-known                                       |
| <i>Typhlops syntherus</i>     | Typhlopidae | Well-known                                       |
| <i>Typhlops tetrathyreus</i>  | Typhlopidae | Well-known                                       |
| <i>Typhlops titanops</i>      | Typhlopidae | Well-known                                       |
| <i>Ungaliophis panamensis</i> | Boidae      | Poorly-known                                     |
| <i>Uromacer catesbyi</i>      | Dipsadidae  | Well-known                                       |
| <i>Uromacer frenatus</i>      | Dipsadidae  | Well-known                                       |
| <i>Uromacer oxyrhynchus</i>   | Dipsadidae  | Well-known                                       |
| <i>Uromacerina ricardinii</i> | Dipsadidae  | Well-known                                       |
| <i>Urotheca decipiens</i>     | Dipsadidae  | Poorly-known                                     |
| <i>Urotheca dumerilii</i>     | Dipsadidae  | Poorly-known                                     |
| <i>Urotheca fulviceps</i>     | Dipsadidae  | Poorly-known                                     |
| <i>Urotheca guentheri</i>     | Dipsadidae  | Well-known                                       |
| <i>Urotheca lateristriga</i>  | Dipsadidae  | Poorly-known                                     |
| <i>Urotheca multilineata</i>  | Dipsadidae  | Poorly-known                                     |
| <i>Urotheca myersi</i>        | Dipsadidae  | Well-known                                       |
| <i>Urotheca pachyura</i>      | Dipsadidae  | Poorly-known                                     |
| <i>Xenodon dorbignyi</i>      | Dipsadidae  | Well-known                                       |
| <i>Xenodon guentheri</i>      | Dipsadidae  | Well-known                                       |
| <i>Xenodon histricus</i>      | Dipsadidae  | Well-known                                       |
| <i>Xenodon matogrossensis</i> | Dipsadidae  | Well-known                                       |
| <i>Xenodon merremii</i>       | Dipsadidae  | Well-known                                       |
| <i>Xenodon nattereri</i>      | Dipsadidae  | Well-known                                       |
| <i>Xenodon newwedii</i>       | Dipsadidae  | Well-known                                       |
| <i>Xenodon pulcher</i>        | Dipsadidae  | Well-known                                       |

| <b>Neotropical snakes</b>     | <b>Families</b> | <b>Status of knowledge of geographical distribution</b> |
|-------------------------------|-----------------|---------------------------------------------------------|
| <i>Xenodon rabdocephalus</i>  | Dipsadidae      | Well-known                                              |
| <i>Xenodon semicinctus</i>    | Dipsadidae      | Well-known                                              |
| <i>Xenodon severus</i>        | Dipsadidae      | Well-known                                              |
| <i>Xenodon weneri</i>         | Dipsadidae      | Well-known                                              |
| <i>Xenopholis scalaris</i>    | Dipsadidae      | Well-known                                              |
| <i>Xenopholis undulatus</i>   | Dipsadidae      | Well-known                                              |
| <i>Xenopholis werdingorum</i> | Dipsadidae      | Well-known                                              |
