# Supplementary material for: Patterns, biases and prospects in the distribution and diversity of Neotropical snakes
Source: PubMed Central journal article supplement (PMC5765514; doi:10.1111/geb.12679), 2017-11-23
Supplement: GEB-27-14-s005.pdf [file GEB-27-14-s005.pdf]

## Patterns, biases and prospects in the distribution and diversity of Neotropical snakes

Thaís B. Guedes, Ricardo J. Sawaya, Alexander Zizka, Shawn Laffan, Alexander Pyron, Renato S. Bérnils, Martin Jansen, Paulo Passos, Ana L. C. Prudente, Diego F. Cisneros-Heredia, Henrique B. Braz, Cristiano de C. Nogueira & Alexandre Antonelli

**Appendix S5** Table containing species richness summary in ecoregion scale. Specific species column show the number of species recorded exclusively in each ecoregion.

| Ecoregion Name                                           | Species Richness | Specific Species | Area of the Ecoregion (km <sup>2</sup> ) |
|----------------------------------------------------------|------------------|------------------|------------------------------------------|
| Alta Paraná Atlantic forests                             | 169              | 1                | 482879                                   |
| Alvarado mangroves                                       | 3                | 0                | 40894                                    |
| Amapa mangroves                                          | 0                | 0                | 17859                                    |
| Apure-Villavicencio dry forests                          | 49               | 1                | 68245                                    |
| Araucaria moist forests                                  | 110              | 2                | 215673                                   |
| Araya and Paria xeric scrub                              | 21               | 0                | 5260                                     |
| Argentine Espinal                                        | 42               | 0                | 298735                                   |
| Argentine Monte                                          | 23               | 0                | 353640                                   |
| Arid Chaco                                               | 21               | 0                | 99394                                    |
| Aruba-Curacao-Bonaire cactus scrub                       | 1                | 0                | 462                                      |
| Atacama desert                                           | 1                | 0                | 104903                                   |
| Atlantic Coast restingas                                 | 74               | 0                | 7850                                     |
| Atlantic dry forests                                     | 68               | 0                | 114660                                   |
| Bahamian dry forests                                     | 2                | 0                | 4827                                     |
| Bahamian mangroves                                       | 4                | 1                | 26658                                    |
| Bahamian pine forests                                    | 1                | 0                | 6870                                     |
| Bahia coastal forests                                    | 106              | 1                | 109305                                   |
| Bahia interior forests                                   | 130              | 1                | 229241                                   |
| Bahia mangroves                                          | 31               | 0                | 8174                                     |
| Bajío dry forests                                        | 13               | 1                | 37384                                    |
| Balsas dry forests                                       | 28               | 1                | 62247                                    |
| Belizean Coast mangroves                                 | 3                | 0                | 13461                                    |
| Belizean Reef mangroves                                  | 0                | 0                | 10025                                    |
| Belizian pine forests                                    | 15               | 0                | 2822                                     |
| Beni savanna                                             | 35               | 0                | 125589                                   |
| Bocas del Toro-San Bastimentos Island-San Blas mangroves | 0                | 0                | 7827                                     |
| Bolivian montane dry forests                             | 43               | 3                | 72780                                    |
| Bolivian Yungas                                          | 52               | 1                | 90229                                    |
| Caatinga                                                 | 102              | 5                | 731320                                   |
| Caatinga Enclaves moist forests                          | 41               | 0                | 4776                                     |
| Campos Rupestres montane savanna                         | 75               | 0                | 26313                                    |
| Caqueta moist forests                                    | 35               | 1                | 183358                                   |
| Catatumbo moist forests                                  | 6                | 0                | 22753                                    |
| Cauca Valley dry forests                                 | 10               | 0                | 7313                                     |
| Cauca Valley montane forests                             | 19               | 2                | 31915                                    |

| <b>Ecoregion Name</b>                                 | <b>Species Richness</b> | <b>Specific Species</b> | <b>Area of the Ecoregion (km<sup>2</sup>)</b> |
|-------------------------------------------------------|-------------------------|-------------------------|-----------------------------------------------|
| Cayman Islands dry forests                            | 0                       | 0                       | 134                                           |
| Cayos Miskitos-San Andrés & Providencia moist forests | 1                       | 0                       | 95                                            |
| Central American Atlantic moist forests               | 44                      | 5                       | 89450                                         |
| Central American dry forests                          | 67                      | 2                       | 67773                                         |
| Central American montane forests                      | 47                      | 4                       | 13251                                         |
| Central American pine-oak forests                     | 84                      | 7                       | 110942                                        |
| Central Andean dry puna                               | 3                       | 0                       | 254929                                        |
| Central Andean puna                                   | 6                       | 0                       | 211478                                        |
| Central Andean wet puna                               | 12                      | 0                       | 116948                                        |
| Central Mexican wetlands                              | 1                       | 0                       | 281                                           |
| Cerrado                                               | 222                     | 10                      | 1910038                                       |
| Chaco                                                 | 83                      | 1                       | 786790                                        |
| Chiapas Depression dry forests                        | 23                      | 0                       | 13974                                         |
| Chiapas montane forests                               | 23                      | 1                       | 5759                                          |
| Chilean matorral                                      | 2                       | 0                       | 148381                                        |
| Chimalapas montane forests                            | 10                      | 0                       | 2077                                          |
| Chiquitano dry forests                                | 123                     | 3                       | 229767                                        |
| Chocó-Darién moist forests                            | 35                      | 2                       | 73305                                         |
| clipperton Island Scrub and Grassland                 | 0                       | 0                       | 29                                            |
| Coastal Venezuelan mangroves                          | 11                      | 1                       | 5895                                          |
| Cocos Island moist forests                            | 0                       | 0                       | 25                                            |
| Cordillera Central paramo                             | 0                       | 0                       | 12120                                         |
| Cordillera de Merida paramo                           | 2                       | 0                       | 2798                                          |
| Cordillera La Costa montane forests                   | 33                      | 0                       | 14282                                         |
| Cordillera Oriental montane forests                   | 36                      | 1                       | 67577                                         |
| Córdoba montane savanna                               | 32                      | 0                       | 58472                                         |
| Costa Rican seasonal moist forests                    | 70                      | 0                       | 10900                                         |
| Cuban cactus scrub                                    | 5                       | 0                       | 3256                                          |
| Cuban dry forests                                     | 12                      | 5                       | 65745                                         |
| Cuban moist forests                                   | 8                       | 2                       | 21339                                         |
| Cuban pine forests                                    | 6                       | 0                       | 6405                                          |
| Cuban wetlands                                        | 1                       | 0                       | 5647                                          |
| Eastern Cordillera real montane forests               | 92                      | 5                       | 102062                                        |
| Eastern Panamanian montane forests                    | 2                       | 0                       | 3031                                          |
| Ecuadorian dry forests                                | 10                      | 1                       | 21187                                         |
| Enriquillo wetlands                                   | 8                       | 0                       | 628                                           |
| Esmeraldes/Chocó mangroves                            | 4                       | 0                       | 6539                                          |
| Everglades                                            | 0                       | 0                       | 20028                                         |
| Fernando de Noronha-Atol das Rocas moist forests      | 0                       | 0                       | 19                                            |
| Galapagos Islands xeric scrub                         | 0                       | 0                       | 7978                                          |
| Greater Antilles mangroves                            | 18                      | 1                       | 10692                                         |
| Guajira-Barranquilla xeric scrub                      | 26                      | 0                       | 31477                                         |
| Guayanan Highlands moist forests                      | 77                      | 3                       | 145963                                        |
| Guayaquil flooded grasslands                          | 0                       | 0                       | 2924                                          |
| Guianan Freshwater swamp forests                      | 51                      | 0                       | 7690                                          |

| <b>Ecoregion Name</b>                    | <b>Species Richness</b> | <b>Specific Species</b> | <b>Area of the Ecoregion (km<sup>2</sup>)</b> |
|------------------------------------------|-------------------------|-------------------------|-----------------------------------------------|
| Guianan mangroves                        | 72                      | 0                       | 14693                                         |
| Guianan moist forests                    | 108                     | 0                       | 476136                                        |
| Gulf of Fonseca mangroves                | 1                       | 0                       | 1637                                          |
| Gulf of Guayaquil-Tumbes mangroves       | 1                       | 0                       | 3343                                          |
| Gulf of Panama mangroves                 | 3                       | 0                       | 2445                                          |
| Gurupa varzea                            | 7                       | 0                       | 9881                                          |
| Guyanan savanna                          | 78                      | 0                       | 104510                                        |
| Hispaniolan dry forests                  | 23                      | 2                       | 15446                                         |
| Hispaniolan moist forests                | 21                      | 3                       | 45814                                         |
| Hispaniolan pine forests                 | 10                      | 0                       | 11560                                         |
| Humid Chaco                              | 102                     | 0                       | 291590                                        |
| Humid Pampas                             | 45                      | 1                       | 398555                                        |
| Ilha Grande mangroves                    | 45                      | 0                       | 3228                                          |
| Iquitos varzea                           | 87                      | 0                       | 114506                                        |
| Islas Revillagigedo dry forests          | 0                       | 0                       | 213                                           |
| Isthmian-Atlantic moist forests          | 88                      | 9                       | 58359                                         |
| Isthmian-Pacific moist forests           | 61                      | 6                       | 29176                                         |
| Jalisco dry forests                      | 49                      | 2                       | 26050                                         |
| Jamaican dry forests                     | 0                       | 0                       | 2310                                          |
| Jamaican moist forests                   | 0                       | 0                       | 8270                                          |
| Japurá-Solimoes-Negro moist forests      | 77                      | 0                       | 268444                                        |
| Juan Fernandez Islands temperate forests | 0                       | 0                       | 146                                           |
| Juruá-Purus moist forests                | 55                      | 0                       | 241493                                        |
| La Costa xeric shrublands                | 47                      | 0                       | 68181                                         |
| Lara-Falcón dry forests                  | 19                      | 1                       | 16870                                         |
| Leeward Islands dry forests              | 1                       | 0                       | 907                                           |
| Leeward Islands moist forests            | 1                       | 0                       | 986                                           |
| Leeward Islands xeric scrub              | 2                       | 2                       | 3228                                          |
| Lesser Antilles mangroves                | 0                       | 0                       | 657                                           |
| Llanos                                   | 49                      | 0                       | 375787                                        |
| Madeira-Tapajós moist forests            | 128                     | 1                       | 716682                                        |
| Magdalena Valley dry forests             | 17                      | 1                       | 19549                                         |
| Magdalena Valley montane forests         | 40                      | 1                       | 104598                                        |
| Magdalena-Santa Marta mangroves          | 9                       | 0                       | 3221                                          |
| Magdalena-Urabá moist forests            | 12                      | 0                       | 76440                                         |
| Magellanic subpolar forests              | 0                       | 0                       | 164642                                        |
| Malpelo Island xeric scrub               | 0                       | 0                       | 8                                             |
| Manabi mangroves                         | 0                       | 0                       | 1159                                          |
| Maracaibo dry forests                    | 6                       | 0                       | 30085                                         |
| Marajó Varzea forests                    | 84                      | 0                       | 88305                                         |
| Maranhao Babaçu forests                  | 69                      | 0                       | 141635                                        |
| Maranhao mangroves                       | 57                      | 0                       | 11414                                         |
| Marañón dry forests                      | 5                       | 0                       | 11322                                         |
| Marismas Nacionales-San Blas mangroves   | 5                       | 0                       | 2054                                          |
| Mato Grosso seasonal forests             | 123                     | 1                       | 412314                                        |
| Mayan Corridor mangroves                 | 0                       | 0                       | 4123                                          |
| Mexican South Pacific Coast mangroves    | 4                       | 0                       | 1119                                          |

| <b>Ecoregion Name</b>                            | <b>Species Richness</b> | <b>Specific Species</b> | <b>Area of the Ecoregion (km<sup>2</sup>)</b> |
|--------------------------------------------------|-------------------------|-------------------------|-----------------------------------------------|
| Miskito pine forests                             | 3                       | 0                       | 18854                                         |
| Moist Pacific Coast mangroves                    | 13                      | 1                       | 1611                                          |
| Monte Alegre varzeá                              | 75                      | 0                       | 66506                                         |
| Mosquita-Nicaraguan Caribbean Coast mangroves    | 3                       | 0                       | 4473                                          |
| Motagua Valley thornscrub                        | 1                       | 0                       | 2328                                          |
| Napo moist forests                               | 100                     | 3                       | 250591                                        |
| Negro-Branco moist forests                       | 48                      | 0                       | 200932                                        |
| Northeastern Brazil restingas                    | 15                      | 0                       | 10011                                         |
| Northern Andean paramo                           | 10                      | 0                       | 29810                                         |
| Northern Dry Pacific Coast mangroves             | 1                       | 0                       | 1065                                          |
| Northern Honduras mangroves                      | 0                       | 0                       | 1065                                          |
| Northwestern Andean montane forests              | 57                      | 11                      | 80806                                         |
| Oaxacan montane forests                          | 20                      | 1                       | 7577                                          |
| Orinoco Delta swamp forests                      | 24                      | 0                       | 28028                                         |
| Orinoco wetlands                                 | 6                       | 0                       | 5988                                          |
| Panamanian dry forests                           | 5                       | 0                       | 5087                                          |
| Pantanal                                         | 85                      | 0                       | 170501                                        |
| Pantanos de Centla                               | 8                       | 0                       | 17153                                         |
| Para mangroves                                   | 59                      | 0                       | 4452                                          |
| Paraguana xeric scrub                            | 5                       | 0                       | 15909                                         |
| Paraná flooded savanna                           | 48                      | 0                       | 37099                                         |
| Patagonian grasslands                            | 0                       | 0                       | 63184                                         |
| Patagonian steppe                                | 4                       | 0                       | 576599                                        |
| Patia Valley dry forests                         | 3                       | 0                       | 2261                                          |
| Pernambuco coastal forests                       | 44                      | 2                       | 17502                                         |
| Pernambuco interior forests                      | 56                      | 1                       | 22597                                         |
| Peruvian Yungas                                  | 53                      | 7                       | 185961                                        |
| Petén-Veracruz moist forests                     | 70                      | 3                       | 148595                                        |
| Petenes mangroves                                | 5                       | 0                       | 1992                                          |
| Piura mangroves                                  | 1                       | 0                       | 118                                           |
| Puerto Rican dry forests                         | 3                       | 0                       | 1271                                          |
| Puerto Rican moist forests                       | 7                       | 0                       | 7504                                          |
| Purus varzeá                                     | 72                      | 0                       | 176760                                        |
| Purus-Madeira moist forests                      | 69                      | 0                       | 173261                                        |
| Rio Lagartos mangroves                           | 5                       | 0                       | 3491                                          |
| Rio Negro campinarana                            | 27                      | 0                       | 95986                                         |
| Rio Negro-Rio San Sun mangroves                  | 3                       | 0                       | 481                                           |
| Rio Piranhas mangroves                           | 30                      | 0                       | 2133                                          |
| Rio Sao Francisco mangroves                      | 34                      | 0                       | 2641                                          |
| San Felix-San Ambrosio Islands temperate forests | 0                       | 0                       | 6                                             |
| San Lucan xeric scrub                            | 0                       | 0                       | 3867                                          |
| Santa Marta montane forests                      | 8                       | 1                       | 4766                                          |
| Santa Marta paramo                               | 0                       | 0                       | 1239                                          |
| Sechura desert                                   | 13                      | 4                       | 184213                                        |
| Semi-arid Pampas                                 | 24                      | 1                       | 328370                                        |

| <b>Ecoregion Name</b>                        | <b>Species Richness</b> | <b>Specific Species</b> | <b>Area of the Ecoregion (km<sup>2</sup>)</b> |
|----------------------------------------------|-------------------------|-------------------------|-----------------------------------------------|
| Serra do Mar coastal forests                 | 136                     | 2                       | 104610                                        |
| Sierra de la Laguna dry forests              | 0                       | 0                       | 3975                                          |
| Sierra de la Laguna pine-oak forests         | 0                       | 0                       | 1061                                          |
| Sierra de los Tuxtlas                        | 8                       | 0                       | 3890                                          |
| Sierra Madre de Chiapas moist forest         | 51                      | 2                       | 11218                                         |
| Sierra Madre de Oaxaca pine-oak forests      | 22                      | 3                       | 14298                                         |
| Sierra Madre del Sur pine-oak forests        | 28                      | 6                       | 60973                                         |
| Sinaloan dry forests                         | 48                      | 12                      | 77362                                         |
| Sinú Valley dry forests                      | 7                       | 0                       | 24879                                         |
| Solimoes-Japurá moist forest                 | 62                      | 3                       | 166931                                        |
| South Florida rocklands                      | 0                       | 0                       | 2071                                          |
| Southern Andean steppe                       | 9                       | 0                       | 124779                                        |
| Southern Andean Yungas                       | 32                      | 0                       | 75150                                         |
| Southern Cone Mesopotamian savanna           | 58                      | 0                       | 26867                                         |
| Southern Dry Pacific Coast mangroves         | 7                       | 0                       | 907                                           |
| Southern Pacific dry forests                 | 55                      | 1                       | 42282                                         |
| Southwest Amazon moist forests               | 113                     | 1                       | 746653                                        |
| St. Peter and St. Paul Rocks                 | 0                       | 0                       | 6                                             |
| Talamancan montane forests                   | 69                      | 5                       | 16274                                         |
| Tapajós-Xingu moist forests                  | 98                      | 0                       | 335099                                        |
| Tehuacan Valley matorral                     | 12                      | 0                       | 9862                                          |
| Tehuantepec-El Manchon mangroves             | 2                       | 0                       | 2716                                          |
| Tepuis                                       | 21                      | 1                       | 50675                                         |
| Tocantins/Pindare moist forests              | 101                     | 1                       | 192766                                        |
| Trans-Mexican Volcanic Belt pine-oak forests | 52                      | 9                       | 98111                                         |
| Trindade-Martin Vaz Islands tropical forests | 0                       | 0                       | 9                                             |
| Trinidad and Tobago dry forests              | 11                      | 0                       | 5056                                          |
| Trinidad and Tobago moist forests            | 40                      | 1                       | 4722                                          |
| Trinidad mangroves                           | 10                      | 0                       | 188                                           |
| Tumbes-Piura dry forests                     | 7                       | 3                       | 41100                                         |
| Uatuma-Trombetas moist forests               | 109                     | 0                       | 470048                                        |
| Ucayali moist forests                        | 63                      | 0                       | 114443                                        |
| Uruguayan savanna                            | 67                      | 0                       | 352496                                        |
| Usumacinta mangroves                         | 0                       | 0                       | 3153                                          |
| Valdivian temperate forests                  | 3                       | 0                       | 248398                                        |
| Venezuelan Andes montane forests             | 25                      | 2                       | 29269                                         |
| Veracruz dry forests                         | 13                      | 0                       | 6616                                          |
| Veracruz moist forests                       | 42                      | 6                       | 68946                                         |
| Veracruz montane forests                     | 4                       | 0                       | 4942                                          |
| Western Ecuador moist forests                | 49                      | 5                       | 33954                                         |
| Windward Islands dry forests                 | 1                       | 0                       | 498                                           |
| Windward Islands moist forests               | 4                       | 2                       | 2014                                          |
| Windward Islands xeric scrub                 | 0                       | 0                       | 1035                                          |
| Xingu-Tocantins-Araguaia moist forests       | 91                      | 0                       | 265072                                        |
| Yucatán dry forests                          | 40                      | 2                       | 49623                                         |
| Yucatán moist forests                        | 42                      | 2                       | 69482                                         |
| Zacatonal                                    | 2                       | 0                       | 303                                           |
